# Supplementary material for: Theoretical study on the photochemistry of furoylazides: Curtius rearrangement and subsequent reactions
Source: Royal Society of Chemistry journal article supplement (doi:10.1039/d0cp05539e), 2020-01-01

**Supporting Information for**  
**Theoretical study on photochemistry of furoylazides:**  
**Curtius rearrangement and subsequent reactions**

Jian Li, Meng-Kai Liu, Quan-Song Li\*, Ze-Sheng Li\*

Beijing Key Laboratory of Photoelectronic/Electrophotonic Conversion  
Materials, Key Laboratory of Cluster Science of Ministry of Education,  
School of Chemistry and Chemical Engineering, Beijing Institute of  
Technology, Beijing 100081, China

Corresponding Authors

\*liquansong@bit.edu.cn (Q.-S. Li)

\*zeshengli@bit.edu.cn (Z.-S. Li)

## CONTENTS

|                                                                                                                                                                |     |
|----------------------------------------------------------------------------------------------------------------------------------------------------------------|-----|
| Table S1. TD-CAM-B3LYP vertical excitations at <b>1</b> -S <sub>0</sub> .....                                                                                  | S3  |
| Table S2. TD- M06-2X vertical excitations at <b>1</b> -S <sub>0</sub> .....                                                                                    | S4  |
| Table S3. TD- $\omega$ B97XD vertical excitations at <b>1</b> -S <sub>0</sub> .....                                                                            | S5  |
| Table S4. CASPT2 vertical excitations at <b>5</b> -S <sub>0</sub> .....                                                                                        | S6  |
| Table S5. TD-CAM-B3LYP vertical excitations at <b>5</b> -S <sub>0</sub> .....                                                                                  | S7  |
| Table S6. TD- M06-2X vertical excitations at <b>5</b> -S <sub>0</sub> .....                                                                                    | S8  |
| Table S7. TD- $\omega$ B97XD vertical excitations at <b>5</b> -S <sub>0</sub> .....                                                                            | S9  |
| Table S8. Relative energies, key bond lengths, angles and Mayer bond orders of furoylnirene <b>2</b> and <b>6</b> .....                                        | S10 |
| Table S9. Relative energies, key bond lengths and Mayer bond orders of furoylnirene <b>4</b> and <b>8</b> . ....                                               | S11 |
| Figure S1. The (12,10) active orbitals of <b>4</b> in the CASPT2 calculations.....                                                                             | S12 |
| Figure S2. The (10,9) active orbitals of <b>4</b> in the CASPT2 calculations.....                                                                              | S13 |
| Figure S3. Energy profiles for the pyrolysis of <b>1</b> .....                                                                                                 | S14 |
| Figure S4. Energy plot from <b>1</b> -S <sub>0</sub> to <b>1</b> -S <sub>1</sub> .....                                                                         | S15 |
| Figure S5. Energy plot from <b>2</b> -(S <sub>0</sub> /S <sub>1</sub> ) <sub>x</sub> to <b>2</b> -S <sub>0</sub> -TS.. ....                                    | S16 |
| Figure S6. Energy plot from <b>7</b> -S <sub>2</sub> to <b>7</b> -S <sub>1</sub> -TS.....                                                                      | S17 |
| Figure S7. Structures and SOMOs of <b>3</b> -(S <sub>0</sub> /S <sub>1</sub> ) <sub>x</sub> and <b>7</b> -(S <sub>0</sub> /S <sub>1</sub> ) <sub>x</sub> ..... | S18 |
| Figure S8. Energy plot from <b>3</b> -(S <sub>0</sub> /S <sub>1</sub> ) <sub>x</sub> to <b>9</b> -S <sub>0</sub> .....                                         | S19 |
| Figure S9. Electron localization of furoylnitrene <b>2</b> , <b>6</b> and furoylnitrene <b>4</b> , <b>8</b> .....                                              | S20 |
| Figure S10. Energy plot from <b>4</b> -S <sub>0</sub> to <b>9</b> -S <sub>0</sub> . ....                                                                       | S21 |
| Figure S11. Energy profiles for the ring-opening of <b>8</b> in the T <sub>1</sub> state.....                                                                  | S22 |
| Molecular structures, energies and Cartesian coordinates of critical points.....                                                                               | S23 |

Table S1. Relative TD-CAM-B3LYP vertical excitation energy ( $\Delta E$ ) and wavelength ( $\lambda$ ) at  $\mathbf{1-S}_0$  together with the electronic configuration (weight in the parenthesis, orbitals below the table) and oscillator strength ( $f$ )

| State           | Configuration and weight | $\Delta E/eV$ | $\lambda/nm$ | Oscillator strength |
|-----------------|--------------------------|---------------|--------------|---------------------|
| S <sub>0</sub>  | -                        | 0.00          | -            | -                   |
| S <sub>1</sub>  | HOMO-1→LUMO(0.68)        | 4.49          | 276          | 0.0001              |
| S <sub>2</sub>  | HOMO-2→LUMO+1(0.63)      | 4.79          | 259          | 0.0004              |
| S <sub>3</sub>  | HOMO→LUMO(0.65)          | 5.00          | 248          | 0.4295              |
| S <sub>4</sub>  | HOMO-2→LUMO(0.44)        | 5.45          | 228          | 0.0582              |
| S <sub>5</sub>  | HOMO→LUMO+1(0.65)        | 6.21          | 200          | 0.0001              |
| S <sub>6</sub>  | HOMO-3→LUMO(0.59)        | 6.26          | 198          | 0.0396              |
| S <sub>7</sub>  | HOMO-4→LUMO(0.57)        | 6.49          | 191          | 0.0004              |
| S <sub>8</sub>  | HOMO-1→LUMO+1(0.46)      | 6.60          | 188          | 0.1462              |
| S <sub>9</sub>  | HOMO→LUMO+2(0.60)        | 7.08          | 175          | 0.0110              |
| S <sub>10</sub> | HOMO-2→LUMO+2(0.42)      | 7.34          | 169          | 0.0023              |

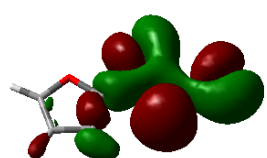

HOMO-4

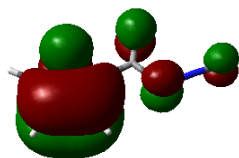

HOMO-3

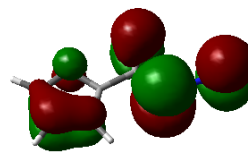

HOMO-2

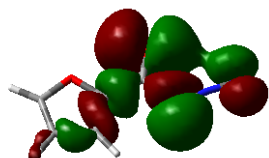

HOMO-1

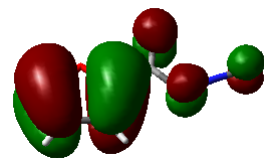

HOMO

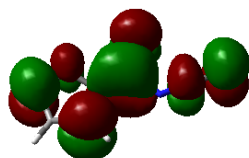

LUMO

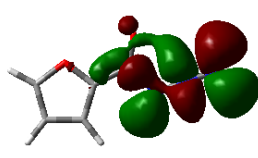

LUMO+1

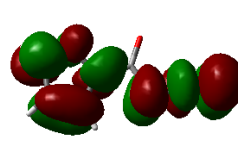

LUMO+2

Table S2. Relative TD-M06-2X vertical excitation energy ( $\Delta E$ ) and wavelength ( $\lambda$ ) at  $1-S_0$  together with the electronic configuration (weight in the parenthesis, orbitals below the table) and oscillator strength ( $f$ )

| State           | Configuration and weight          | $\Delta E/eV$ | $\lambda/nm$ | Oscillator strength |
|-----------------|-----------------------------------|---------------|--------------|---------------------|
| S <sub>0</sub>  | -                                 | 0.00          | -            | -                   |
| S <sub>1</sub>  | HOMO-2 $\rightarrow$ LUMO(0.62)   | 4.35          | 285          | 0.0000              |
| S <sub>2</sub>  | HOMO-1 $\rightarrow$ LUMO+1(0.57) | 4.60          | 269          | 0.0003              |
| S <sub>3</sub>  | HOMO $\rightarrow$ LUMO(0.66)     | 5.08          | 244          | 0.4585              |
| S <sub>4</sub>  | HOMO-1 $\rightarrow$ LUMO(0.50)   | 5.57          | 222          | 0.0351              |
| S <sub>5</sub>  | HOMO $\rightarrow$ LUMO+1(0.65)   | 6.38          | 194          | 0.0000              |
| S <sub>6</sub>  | HOMO-3 $\rightarrow$ LUMO(0.61)   | 6.41          | 193          | 0.0498              |
| S <sub>7</sub>  | HOMO-4 $\rightarrow$ LUMO(0.53)   | 6.51          | 190          | 0.0006              |
| S <sub>8</sub>  | HOMO-2 $\rightarrow$ LUMO+1(0.43) | 6.84          | 181          | 0.1663              |
| S <sub>9</sub>  | HOMO $\rightarrow$ LUMO+2(0.62)   | 7.33          | 169          | 0.0158              |
| S <sub>10</sub> | HOMO-4 $\rightarrow$ LUMO+1(0.43) | 7.62          | 163          | 0.0254              |

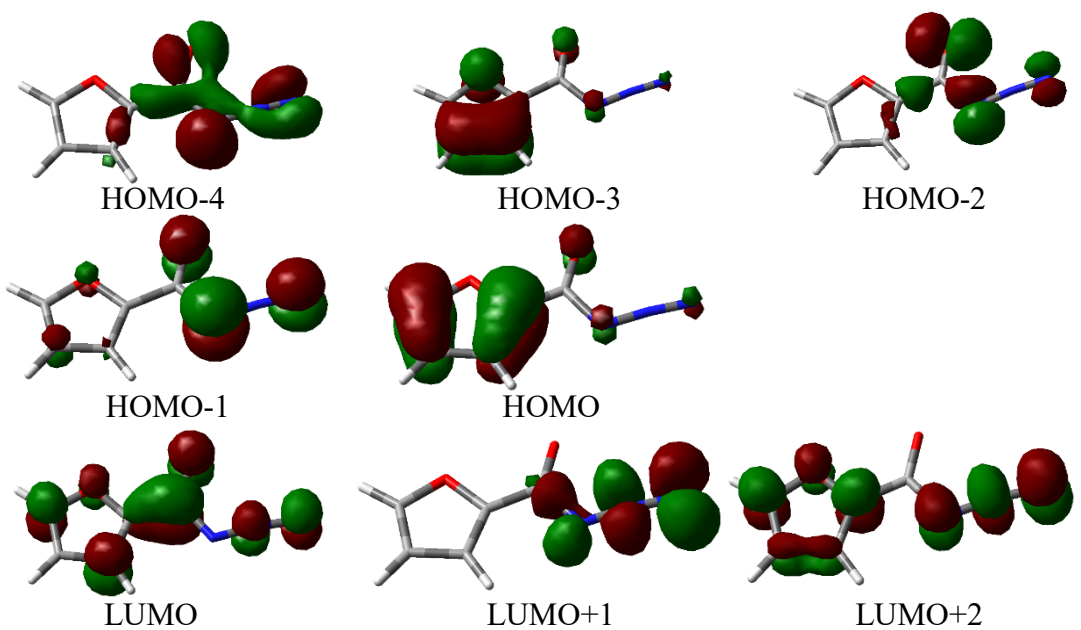

Table S3. Relative TD- $\omega$ B97XD vertical excitation energy ( $\Delta E$ ) and wavelength ( $\lambda$ ) at  $1-S_0$  together with the electronic configuration (weight in the parenthesis, orbitals below the table) and oscillator strength ( $f$ )

| State           | Configuration and weight          | $\Delta E/eV$ | $\lambda/nm$ | Oscillator strength |
|-----------------|-----------------------------------|---------------|--------------|---------------------|
| S <sub>0</sub>  | -                                 | 0.00          | -            | -                   |
| S <sub>1</sub>  | HOMO-1 $\rightarrow$ LUMO(0.69)   | 4.48          | 276          | 0.0001              |
| S <sub>2</sub>  | HOMO-2 $\rightarrow$ LUMO+1(0.63) | 4.86          | 255          | 0.0004              |
| S <sub>3</sub>  | HOMO $\rightarrow$ LUMO(0.65)     | 5.01          | 247          | 0.4348              |
| S <sub>4</sub>  | HOMO-1 $\rightarrow$ LUMO+1(0.44) | 5.46          | 227          | 0.0617              |
| S <sub>5</sub>  | HOMO-3 $\rightarrow$ LUMO(0.58)   | 6.26          | 198          | 0.0369              |
| S <sub>6</sub>  | HOMO $\rightarrow$ LUMO+1(0.64)   | 6.32          | 196          | 0.0001              |
| S <sub>7</sub>  | HOMO-4 $\rightarrow$ LUMO(0.57)   | 6.50          | 190          | 0.0003              |
| S <sub>8</sub>  | HOMO-1 $\rightarrow$ LUMO+1(0.46) | 6.59          | 188          | 0.1426              |
| S <sub>9</sub>  | HOMO $\rightarrow$ LUMO+2(0.58)   | 7.14          | 173          | 0.0179              |
| S <sub>10</sub> | HOMO-2 $\rightarrow$ LUMO+2(0.40) | 7.36          | 168          | 0.0052              |

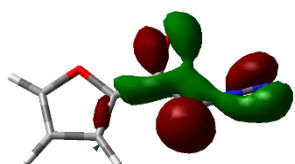

HOMO-4

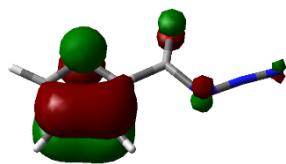

HOMO-3

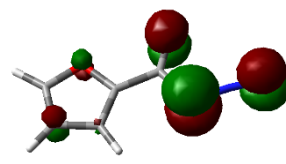

HOMO-2

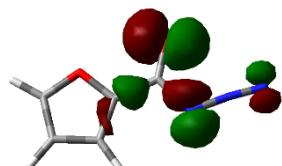

HOMO-1

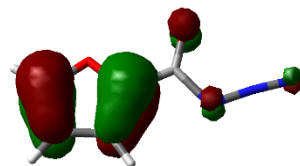

HOMO

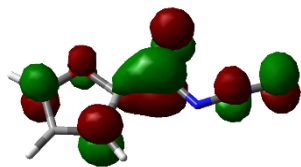

LUMO

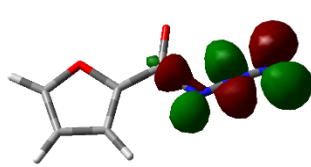

LUMO+1

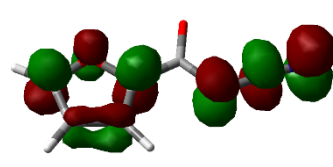

LUMO+2

Table S4. Relative CASPT2 vertical excitation energy ( $\Delta E$ ) and wavelength ( $\lambda$ ) at  $5-S_0$  together with the electronic configuration (weight in the parenthesis, orbitals below the table) and oscillator strength ( $f$ )

| State | Configuration and weight                 | $\Delta E/eV$ | $\lambda/nm$ | Oscillator strength |
|-------|------------------------------------------|---------------|--------------|---------------------|
| $S_0$ | -                                        | 0.00          | -            | -                   |
| $S_1$ | 2u22222d0000(0.72)                       | 3.97          | 312          | 0.0010              |
| $S_2$ | 22u2222d0000(0.37)<br>2u222220d000(0.31) | 4.93          | 251          | 0.1065              |
| $S_3$ | 22222u2d0000(0.55)                       | 5.04          | 246          | 0.0535              |
| $S_4$ | 22u22220d000(0.83)                       | 5.11          | 243          | 0.0011              |

  

The figure displays 12 molecular orbital diagrams, numbered 1 through 12, arranged in a 4x3 grid. Each diagram shows a chemical structure with electron density lobes represented in green and red. The orbitals are labeled 1, 2, 3, 4, 5, 6, 7, 8, 9, 10, 11, and 12.

"u" and "d" stand for singly occupied orbitals with electrons of spin up (u) or spin down (d).

Table S5. Relative TD-CAM-B3LYP vertical excitation energy ( $\Delta E$ ) and wavelength ( $\lambda$ ) at **5**-S<sub>0</sub> together with the electronic configuration (weight in the parenthesis, orbitals below the table) and oscillator strength ( $f$ )

| State           | Configuration and weight | $\Delta E/eV$ | $\lambda/nm$ | Oscillator strength |
|-----------------|--------------------------|---------------|--------------|---------------------|
| S <sub>0</sub>  | -                        | 0.00          | -            | -                   |
| S <sub>1</sub>  | HOMO-1→LUMO(0.68)        | 4.53          | 274          | 0.0001              |
| S <sub>2</sub>  | HOMO-2→LUMO+1(0.66)      | 4.85          | 256          | 0.0005              |
| S <sub>3</sub>  | HOMO→LUMO(0.67)          | 5.21          | 238          | 0.1293              |
| S <sub>4</sub>  | HOMO-2→LUMO(0.47)        | 5.37          | 231          | 0.0101              |
| S <sub>5</sub>  | HOMO-3→LUMO(0.56)        | 6.27          | 198          | 0.2572              |
| S <sub>6</sub>  | HOMO→LUMO+1(0.69)        | 6.33          | 196          | 0.0000              |
| S <sub>7</sub>  | HOMO-4→LUMO(0.59)        | 6.50          | 191          | 0.0004              |
| S <sub>8</sub>  | HOMO-1→LUMO+1(0.48)      | 6.66          | 186          | 0.1754              |
| S <sub>9</sub>  | HOMO→LUMO+2(0.62)        | 6.93          | 179          | 0.2280              |
| S <sub>10</sub> | HOMO-4→LUMO+1(0.46)      | 7.45          | 166          | 0.0685              |

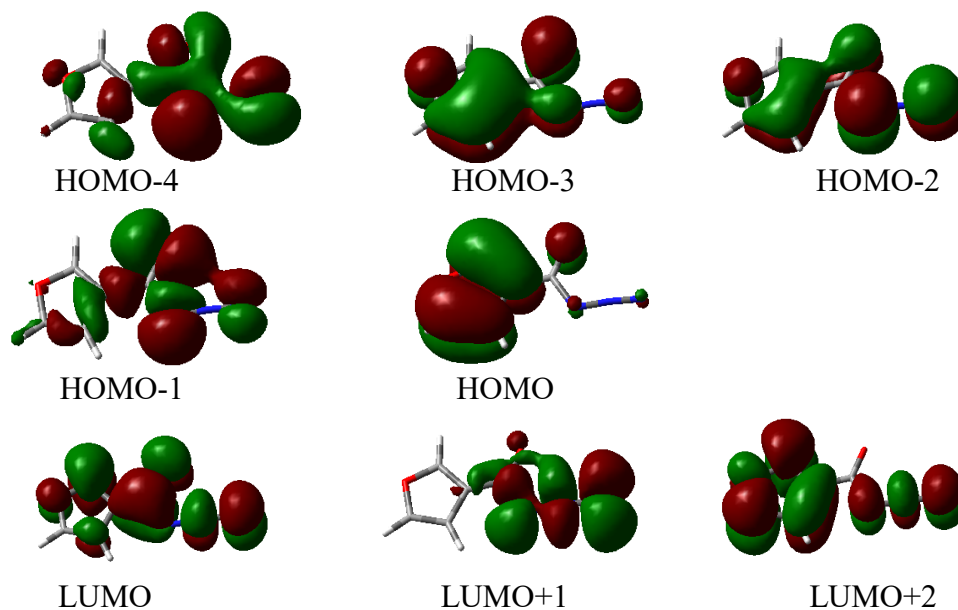

Table S6. Relative TD-M06-2X vertical excitation energy ( $\Delta E$ ) and wavelength ( $\lambda$ ) at  $\mathbf{5-S_0}$  together with the electronic configuration (weight in the parenthesis, orbitals below the table) and oscillator strength ( $f$ )

| State           | Configuration and weight | $\Delta E/eV$ | $\lambda/nm$ | Oscillator strength |
|-----------------|--------------------------|---------------|--------------|---------------------|
| S <sub>0</sub>  | -                        | 0.00          | -            | -                   |
| S <sub>1</sub>  | HOMO-2→LUMO(0.62)        | 4.49          | 276          | 0.0000              |
| S <sub>2</sub>  | HOMO-1→LUMO+1(0.58)      | 4.75          | 261          | 0.0004              |
| S <sub>3</sub>  | HOMO→LUMO(0.68)          | 5.46          | 227          | 0.1298              |
| S <sub>4</sub>  | HOMO-3→LUMO(0.58)        | 5.62          | 220          | 0.0293              |
| S <sub>5</sub>  | HOMO-1→LUMO(0.49)        | 6.49          | 191          | 0.2382              |
| S <sub>6</sub>  | HOMO→LUMO+1(0.69)        | 6.57          | 189          | 0.0000              |
| S <sub>7</sub>  | HOMO-4→LUMO(0.57)        | 6.61          | 188          | 0.0006              |
| S <sub>8</sub>  | HOMO-2→LUMO+1(0.54)      | 6.96          | 178          | 0.2270              |
| S <sub>9</sub>  | HOMO→LUMO+2(0.64)        | 7.76          | 160          | 0.0001              |
| S <sub>10</sub> | HOMO-3→LUMO+1(0.64)      | 7.81          | 159          | 0.0475              |

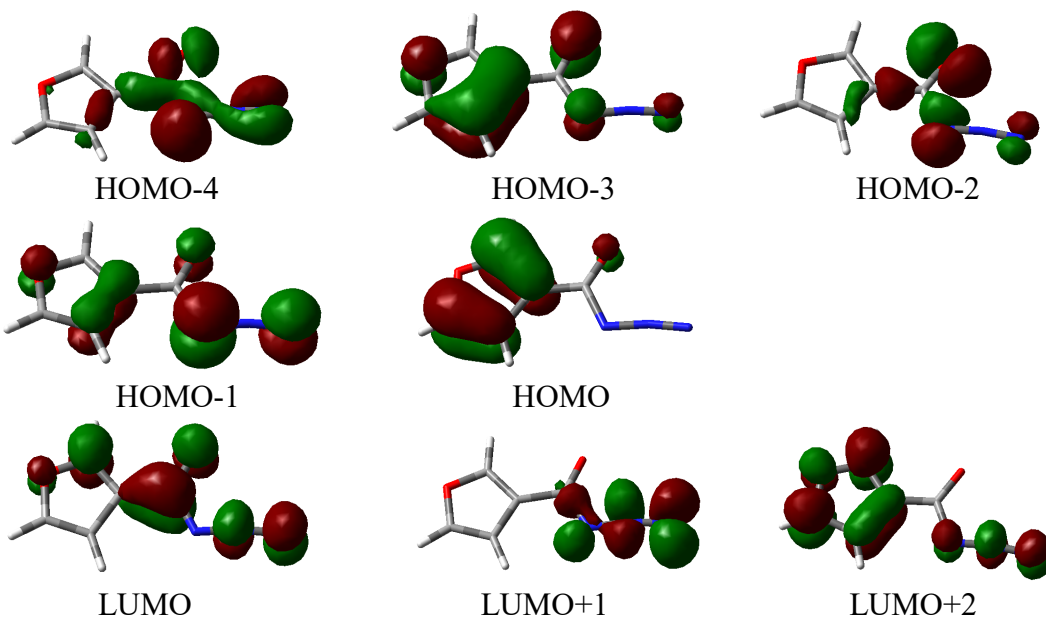



Table S7. Relative TD- $\omega$ B97XD vertical excitation energy ( $\Delta E$ ) and wavelength ( $\lambda$ ) at  $\mathbf{5-S_0}$  together with the electronic configuration (weight in the parenthesis, orbitals below the table) and oscillator strength ( $f$ )

| State           | Configuration and weight          | $\Delta E/eV$ | $\lambda/nm$ | Oscillator strength |
|-----------------|-----------------------------------|---------------|--------------|---------------------|
| S <sub>0</sub>  | -                                 | 0.00          | -            | -                   |
| S <sub>1</sub>  | HOMO-1 $\rightarrow$ LUMO(0.69)   | 4.59          | 270          | 0.0001              |
| S <sub>2</sub>  | HOMO-2 $\rightarrow$ LUMO+1(0.61) | 4.99          | 248          | 0.0004              |
| S <sub>3</sub>  | HOMO $\rightarrow$ LUMO(0.63)     | 5.38          | 230          | 0.1310              |
| S <sub>4</sub>  | HOMO-1 $\rightarrow$ LUMO+1(0.45) | 5.48          | 226          | 0.0012              |
| S <sub>5</sub>  | HOMO-3 $\rightarrow$ LUMO(0.41)   | 6.34          | 196          | 0.3184              |
| S <sub>6</sub>  | HOMO $\rightarrow$ LUMO+1(0.67)   | 6.55          | 189          | 0.0000              |
| S <sub>7</sub>  | HOMO-3 $\rightarrow$ LUMO(0.47)   | 6.59          | 188          | 0.0677              |
| S <sub>8</sub>  | HOMO-4 $\rightarrow$ LUMO(0.60)   | 6.62          | 187          | 0.0004              |
| S <sub>9</sub>  | HOMO $\rightarrow$ LUMO+2(0.60)   | 7.17          | 173          | 0.2305              |
| S <sub>10</sub> | HOMO-4 $\rightarrow$ LUMO+1(0.44) | 7.64          | 162          | 0.1129              |

  

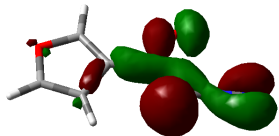  
HOMO-4

  
HOMO-3

  
HOMO-2

  
HOMO-1

  
HOMO

  
LUMO

  
LUMO+1

  
LUMO+2

Table S8. Relative energies (in brackets), key bond lengths(B), angles(A) and Mayer bond orders(in parentheses) of furoylnirene **2** and **6**. Relative energies are shown in eV. Bond lengths are given in Å and angles are in °.

|                   | <b>2-S<sub>0</sub></b> | <b>2-S<sub>1</sub></b> | <b>2-T<sub>1</sub></b> | <b>6-S<sub>0</sub></b> | <b>6-S<sub>1</sub></b> | <b>6-T<sub>1</sub></b> |
|-------------------|------------------------|------------------------|------------------------|------------------------|------------------------|------------------------|
| Relative energies | [0.00]                 | [1.06]                 | [-0.10]                | [-0.09]                | [0.93]                 | [-0.14]                |
| B (C6-O11)        | 1.29<br>(1.04)         | 1.34<br>(1.10)         | 1.21<br>(1.77)         | 1.30<br>(1.06)         | 1.35<br>(1.00)         | 1.22<br>(1.74)         |
| B (C6-N10)        | 1.28<br>(1.63)         | 1.30<br>(1.66)         | 1.40<br>(1.01)         | 1.26<br>(1.63)         | 1.27<br>(1.70)         | 1.39<br>(1.04)         |
| B (O11-N10)       | 1.84<br>(0.85)         | 2.24<br>(0.57)         | 2.26<br>(0.09)         | 1.86<br>(0.84)         | 2.24<br>(0.47)         | 2.24<br>(0.12)         |
| A (N10-C6-O11)    | 91                     | 115                    | 120                    | 93                     | 118                    | 118                    |

Table S9. Relative energies (in brackets), key bond lengths(B) and Mayer bond orders(in parentheses) of furylnirene **4** and **8**. Relative energies are shown in eV. Bond lengths are given in Å.

|                             | <b>4-S<sub>0</sub></b> | <b>4-S<sub>2</sub></b> | <b>4-T<sub>1</sub></b> | <b>8-S<sub>0</sub></b> | <b>8-S<sub>1</sub></b> | <b>8-S<sub>2</sub></b> | <b>8-T<sub>1</sub></b> |
|-----------------------------|------------------------|------------------------|------------------------|------------------------|------------------------|------------------------|------------------------|
| Relative energies           | [0.00]                 | [2.63]                 | [-0.56]                | [0.45]                 | [1.03]                 | [2.66]                 | [-0.32]                |
| B (O1-C2)                   | 1.40<br>(0.93)         | 1.40<br>(0.93)         | 1.39<br>(0.96)         | 1.35<br>(0.95)         | 1.31<br>(1.14)         | 1.34<br>(1.07)         | 1.34<br>(0.96)         |
| B (C2-N10)<br>or B (C3-N10) | 1.26<br>(1.66)         | 1.28<br>(1.58)         | 1.30<br>(1.31)         | 1.26<br>(1.84)         | 1.30<br>(1.56)         | 1.33<br>(1.45)         | 1.33<br>(1.22)         |

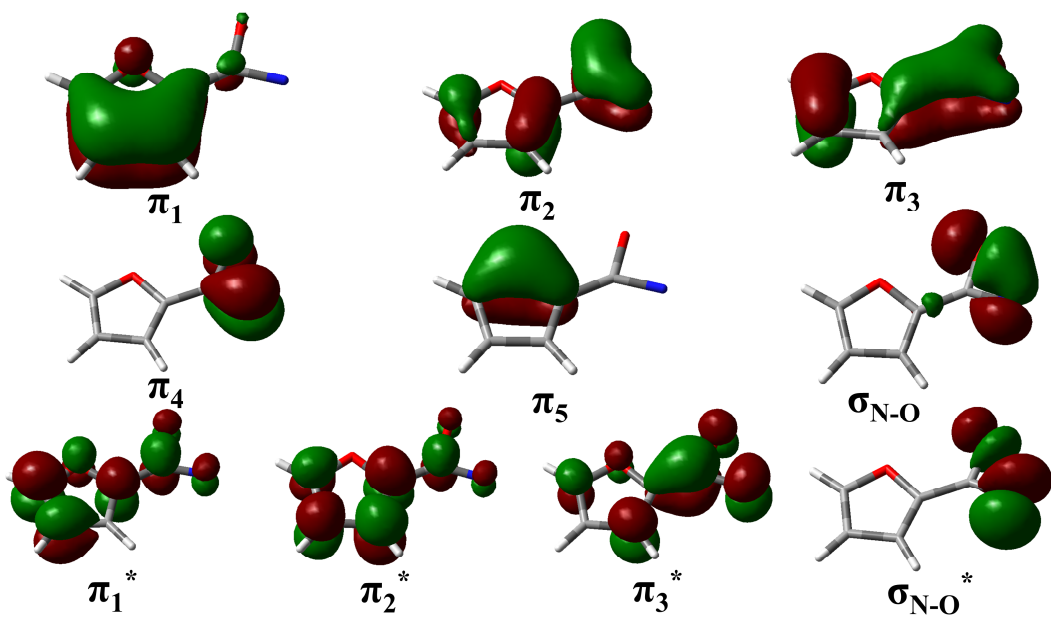

Figure S1. The (12,10) active orbitals of **2** in the CASPT2 calculations.

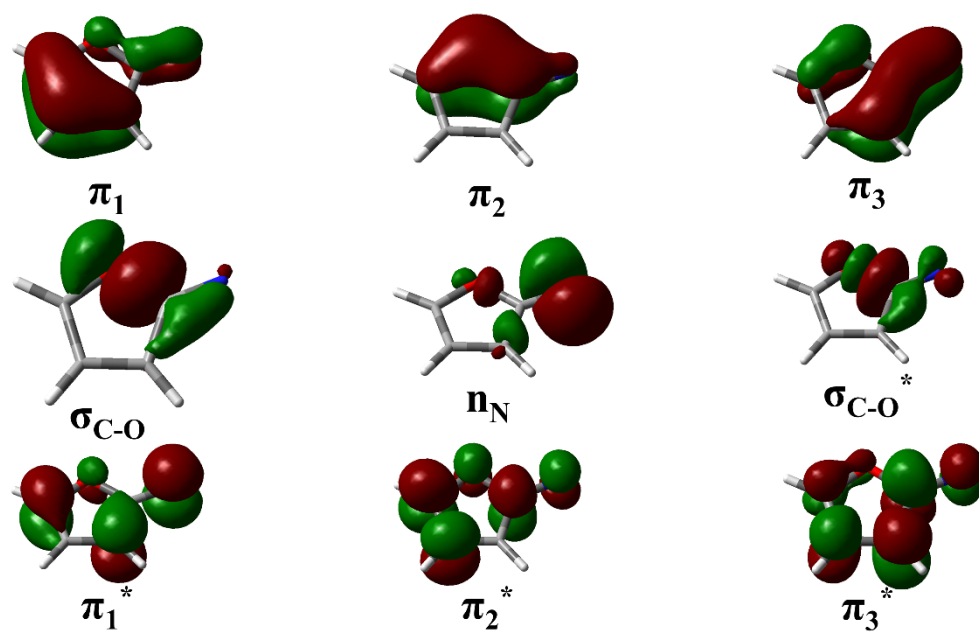

Figure S2. The (10,9) active orbitals of **4** in the CASPT2 calculations.

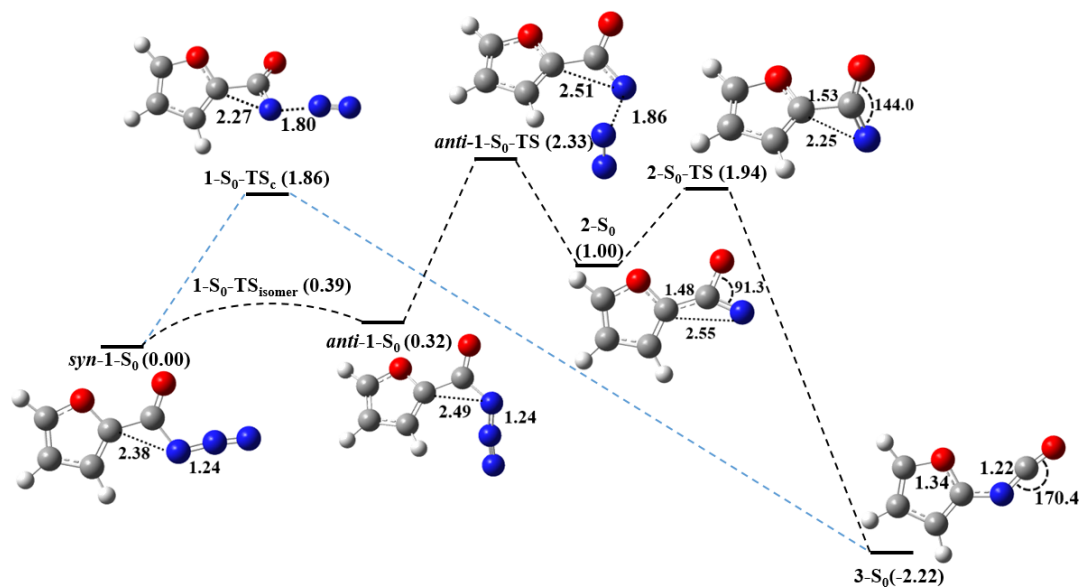

Figure S3. CASPT2//CASSCF energy profiles for the pyrolysis of **1**. Energies are given in eV. Bond lengths are given in Å and angles are in °.

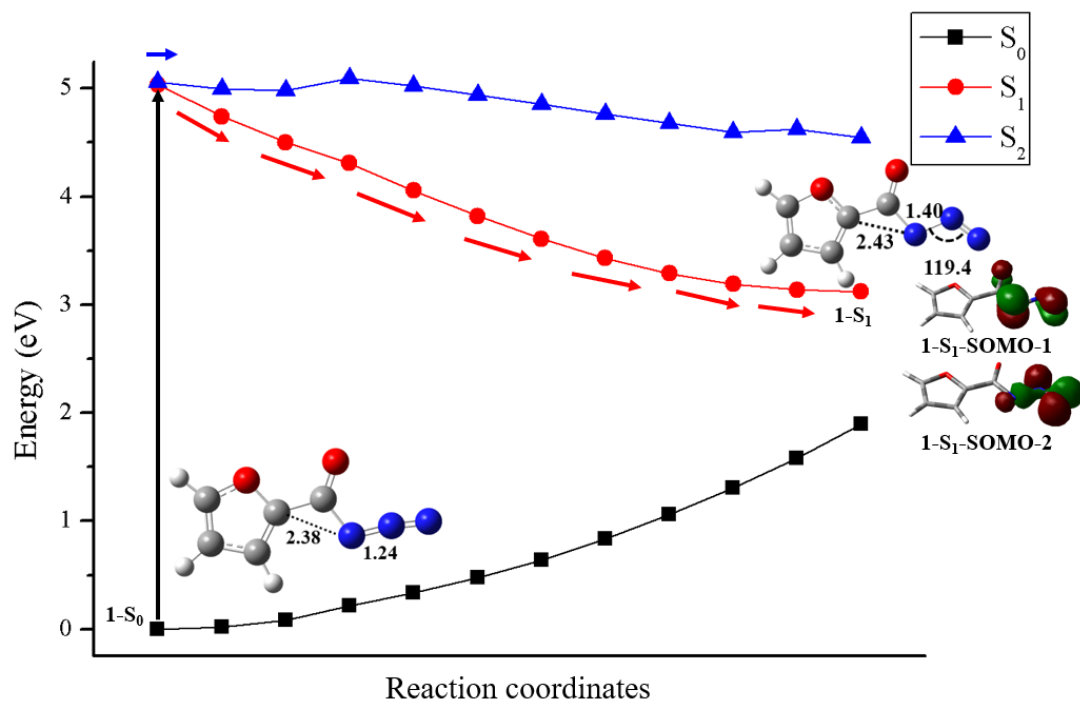

Figure S4. Energy plot from  $1-S_0$  to  $1-S_1$ . Bond lengths are given in Å and angles are in  $^\circ$ .

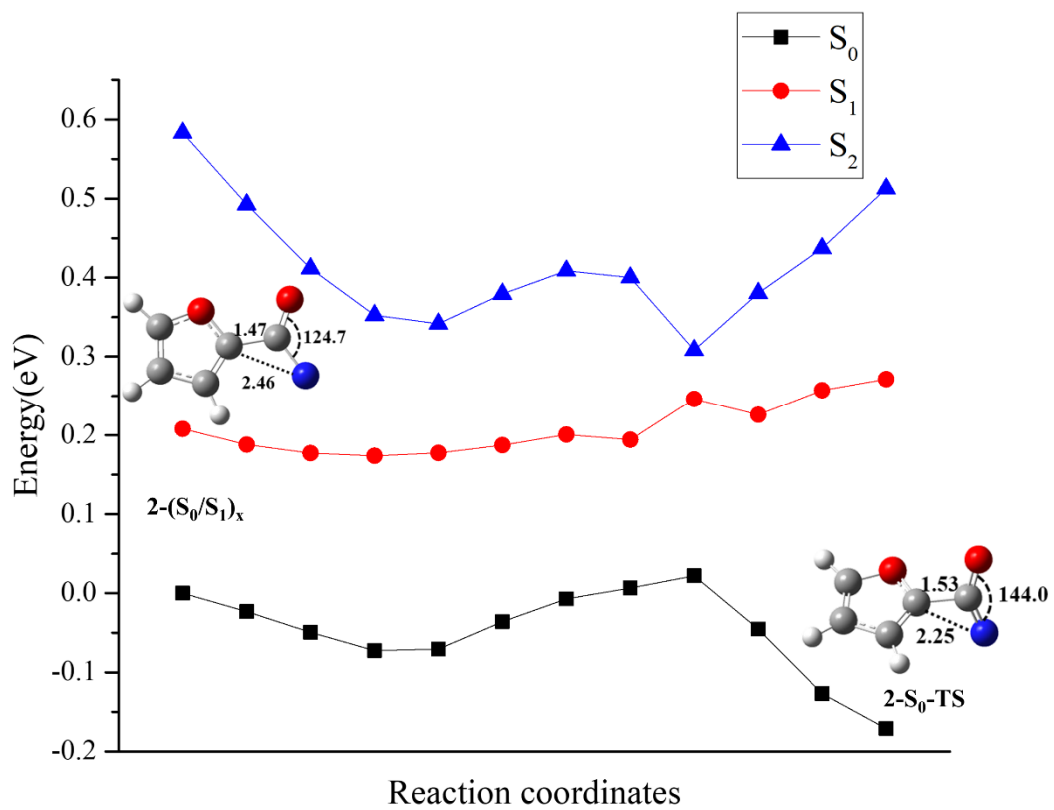

Figure S5. Energy plot from  $2-(S_0/S_1)_x$  to  $2-S_0-TS$ . Bond lengths are given in Å and angles are in °.



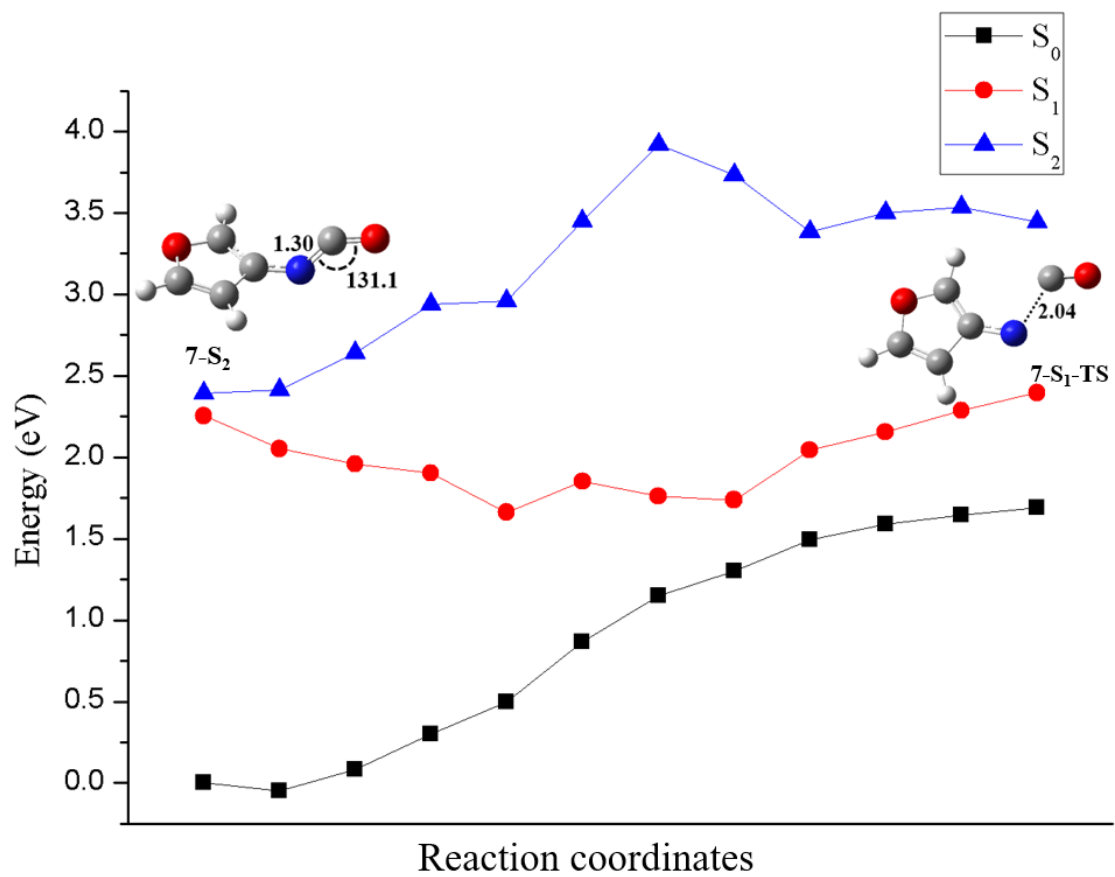

Figure S6. Energy plot from 7- $S_2$  to 7- $S_1$ -TS. Bond lengths are given in Å and angles are in °.

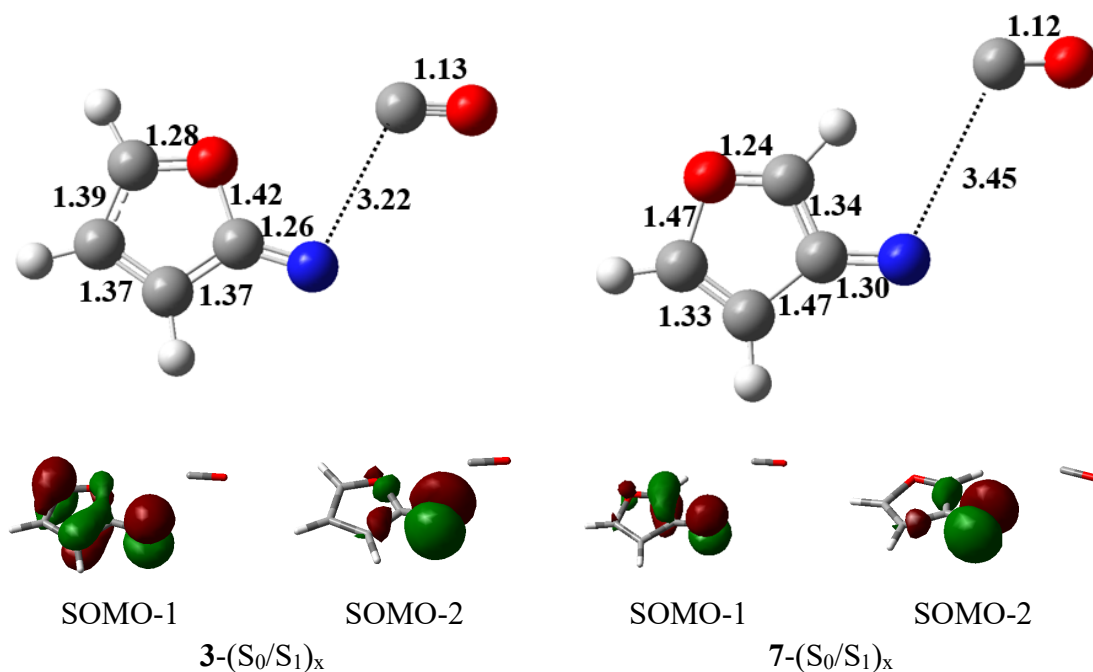

Figure S7. CASSCF optimized structures and SOMOs of conical intersections  $3-(S_0/S_1)_x$  and  $7-(S_0/S_1)_x$ . Bond lengths are given in Å.

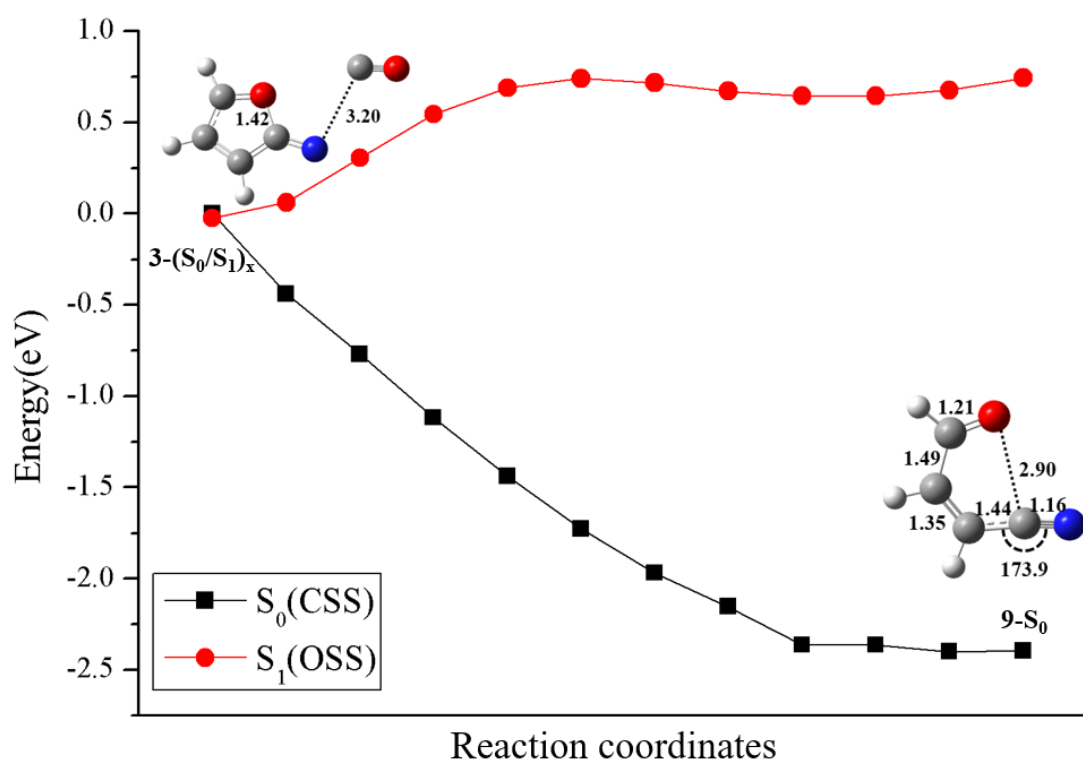

Figure S8. Energy plot from  $3-(S_0/S_1)_x$  to  $9-S_0$ . Bond lengths are given in Å and angles are in °.

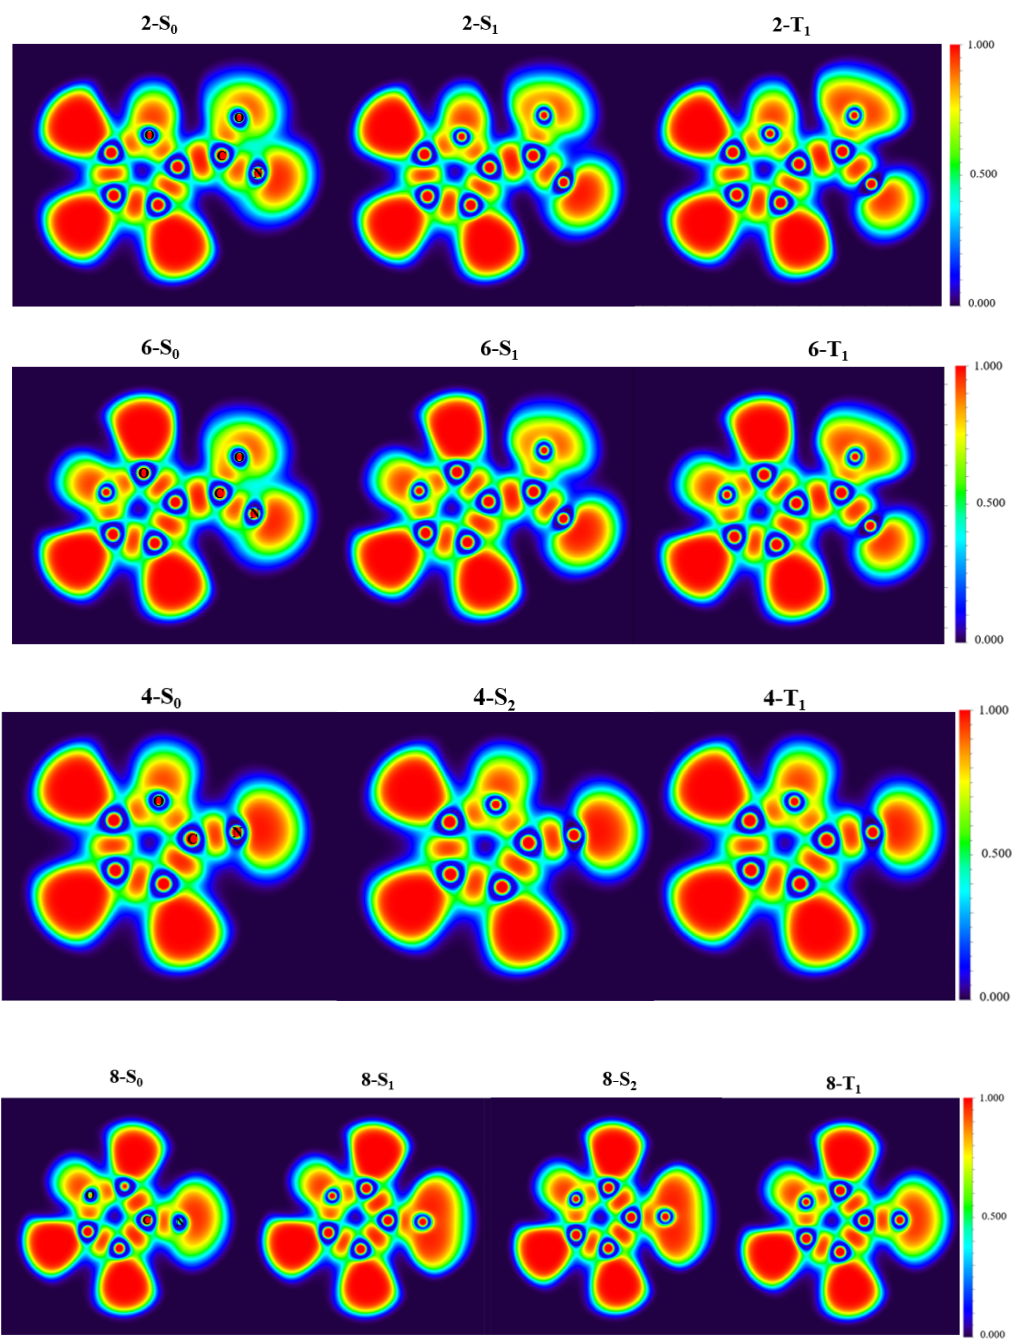

Figure S9. Electron localization of furoylnitrene 2, 6 and furylnitrene 4, 8.

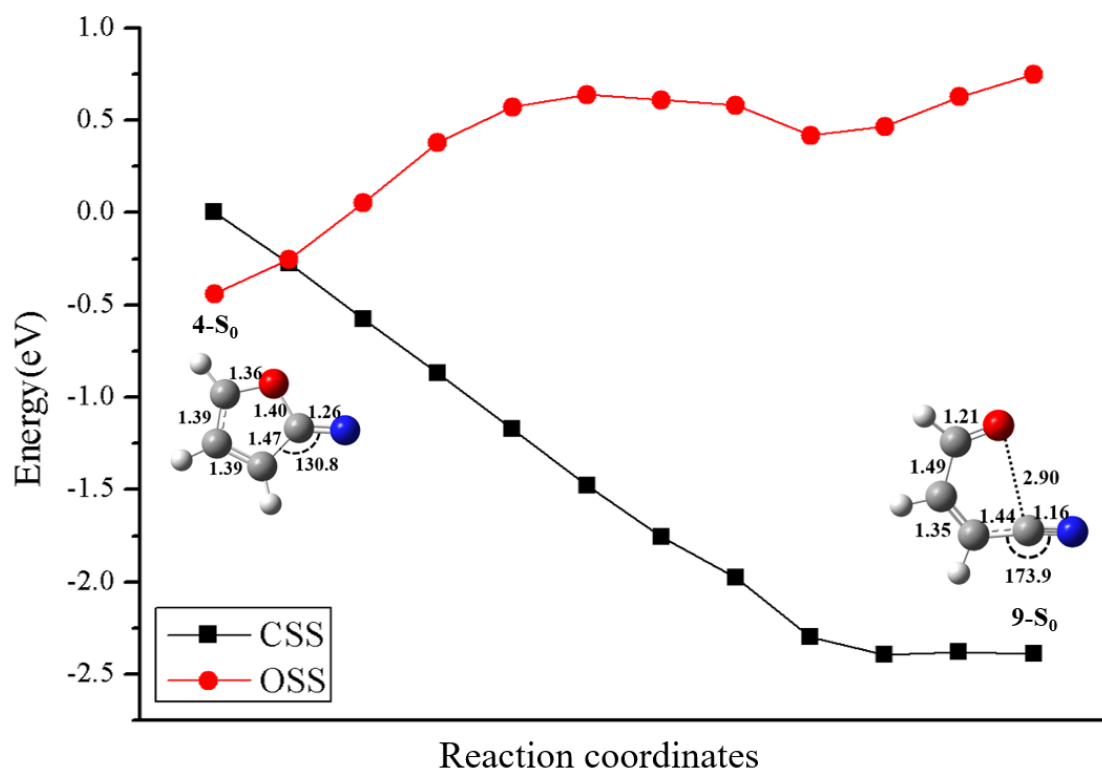

Figure S10. Energy plot from 4-S<sub>0</sub> to 9-S<sub>0</sub>. Bond lengths are given in Å and angles are in °.

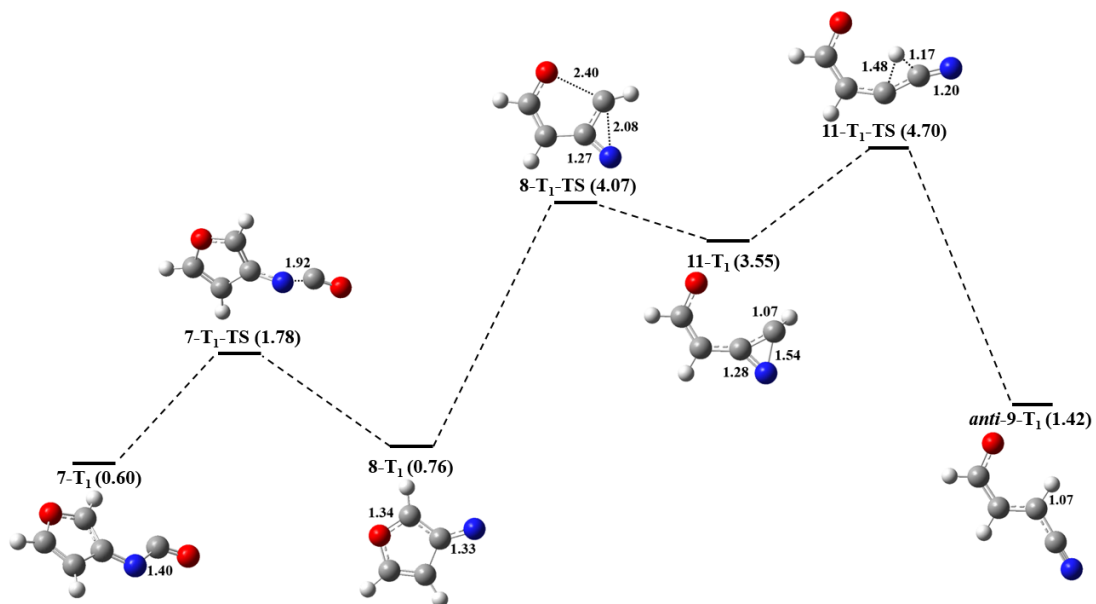

Figure S11. CASPT2//CASSCF energy profiles for the reaction from **7** to **9** in the  $T_1$  state. Energies are given in eV and bond lengths are in Å.

**Molecular structures, Cartesian coordinates, CASPT2 absolute energies (in Hartree) and relative energies in parentheses (in eV) of critical points**

The following relative energies in parentheses are relative to *syn-1-S<sub>0</sub>*.

*syn-1-S<sub>0</sub>* -506.0560020 (0.00)

|   |           |           |           |
|---|-----------|-----------|-----------|
| C | -2.886262 | 0.395057  | -0.000355 |
| C | -2.773246 | -0.943941 | 0.000054  |
| C | -1.364973 | -1.206915 | 0.000437  |
| C | -0.768146 | -0.000929 | -0.000169 |
| H | -3.729328 | 1.051062  | -0.000528 |
| H | -3.571073 | -1.656498 | 0.000281  |
| H | -0.874003 | -2.156803 | 0.001001  |
| C | 0.641926  | 0.408793  | -0.000940 |
| O | 1.016454  | 1.548263  | -0.006264 |
| O | -1.687568 | 0.980443  | -0.000659 |
| N | 1.503738  | -0.704170 | 0.004990  |
| N | 2.708830  | -0.401512 | 0.002051  |
| N | 3.836111  | -0.271215 | -0.000185 |

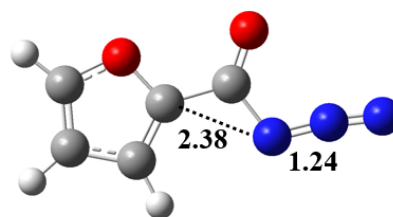

*anti-1-S<sub>0</sub>* -506.0441577 (0.32)

|   |           |           |           |
|---|-----------|-----------|-----------|
| C | -2.943816 | 0.476716  | -0.206718 |
| C | -2.972994 | -0.826998 | 0.112769  |
| C | -1.602981 | -1.203743 | 0.297872  |
| C | -0.880120 | -0.089887 | 0.072328  |
| H | -3.709512 | 1.184440  | -0.438425 |
| H | -3.837825 | -1.448850 | 0.208931  |
| H | -1.238107 | -2.170113 | 0.575592  |
| C | 0.559684  | 0.237111  | 0.157036  |
| O | 0.955757  | 1.356436  | 0.290448  |
| O | -1.692198 | 0.937140  | -0.232186 |
| N | 1.507215  | -0.816387 | 0.157157  |
| N | 1.221871  | -1.874275 | -0.453048 |
| N | 1.157657  | -2.883362 | -0.953901 |

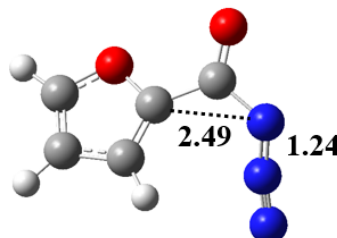

*anti-1-S<sub>0</sub>-TS* -505.97024748 (2.33)

|   |           |           |           |
|---|-----------|-----------|-----------|
| C | 0.024544  | -0.102739 | 0.021117  |
| C | -0.007312 | 0.048442  | 1.354418  |
| C | 1.366035  | 0.108808  | 1.763349  |
| C | 2.091918  | -0.010926 | 0.637116  |
| H | -0.740760 | -0.200165 | -0.717534 |
| H | -0.876339 | 0.114201  | 1.974693  |
| H | 1.739941  | 0.252976  | 2.755317  |
| C | 3.537636  | 0.060640  | 0.335594  |
| O | 3.958777  | 0.508532  | -0.711032 |
| O | 1.281937  | -0.137183 | -0.427625 |
| N | 4.520342  | -0.217794 | 1.241214  |
| N | 3.859515  | -1.517132 | 2.388432  |
| N | 3.902232  | -2.291588 | 3.170647  |

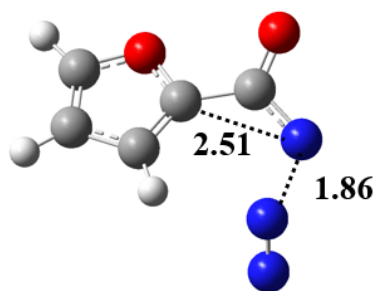

**1-S<sub>0</sub>-TSc** -505.9874926 (1.86)

|   |           |           |           |
|---|-----------|-----------|-----------|
| C | 2.890281  | 0.378713  | -0.416387 |
| C | 2.878044  | -0.816550 | 0.222364  |
| C | 1.495814  | -1.078876 | 0.523351  |
| C | 0.810465  | -0.009750 | 0.039080  |
| H | 3.673349  | 0.980337  | -0.822035 |
| H | 3.724194  | -1.427945 | 0.455668  |
| H | 1.081053  | -1.922637 | 1.032697  |
| C | -0.638162 | 0.347115  | 0.037156  |
| O | -1.063238 | 1.459710  | 0.185916  |
| O | 1.643961  | 0.873803  | -0.535217 |
| N | -1.290301 | -0.829043 | -0.193674 |
| N | -3.002435 | -0.319249 | 0.024546  |
| N | -4.081237 | -0.210894 | 0.080401  |

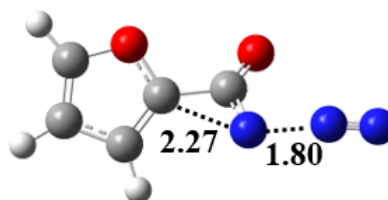

**1-S<sub>1</sub>** -505.9413757 (3.12)

|   |           |           |           |
|---|-----------|-----------|-----------|
| C | -2.910620 | 0.380273  | -0.014143 |
| C | -2.778514 | -0.965557 | 0.023571  |
| C | -1.355933 | -1.211833 | 0.024154  |
| C | -0.783423 | -0.000722 | -0.012760 |
| H | -3.756287 | 1.031999  | -0.031951 |
| H | -3.566794 | -1.688100 | 0.047867  |
| H | -0.855490 | -2.156911 | 0.049178  |
| C | 0.617594  | 0.452940  | -0.029968 |
| O | 0.925733  | 1.620904  | -0.066030 |
| O | -1.704185 | 0.977342  | -0.036953 |
| N | 1.568762  | -0.598597 | -0.001313 |
| N | 2.858924  | -0.043457 | 0.015468  |
| N | 3.792694  | -0.756650 | 0.032599  |

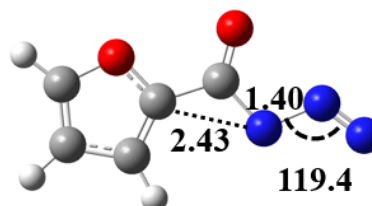



**1-S<sub>1</sub>-TSc** -505.8935451 (4.42)

|   |           |           |           |
|---|-----------|-----------|-----------|
| C | 2.915137  | 0.423091  | -0.518087 |
| C | 2.900162  | -0.901466 | 0.162246  |
| C | 1.518156  | -1.143591 | 0.540709  |
| C | 0.789655  | 0.092389  | 0.153383  |
| H | 3.700004  | 1.151171  | -0.476985 |
| H | 3.722227  | -1.578898 | 0.237271  |
| H | 1.105700  | -1.986538 | 1.046440  |
| C | -0.639898 | 0.342215  | -0.080884 |
| O | -1.097993 | 1.425340  | -0.344837 |
| O | 1.653835  | 0.953053  | -0.422729 |
| N | -1.281119 | -0.864274 | 0.057481  |
| N | -3.043316 | -0.306994 | 0.115837  |
| N | -4.120764 | -0.180764 | 0.164023  |

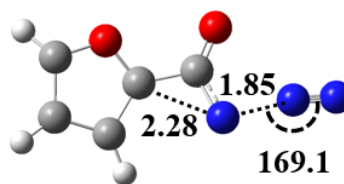

**1-S<sub>1</sub>-TS** -505.9395484 (3.17)

|   |           |           |           |
|---|-----------|-----------|-----------|
| C | 0.039346  | -0.052249 | -0.013823 |
| C | 0.009840  | 0.062641  | 1.333128  |
| C | 1.392026  | 0.022577  | 1.751289  |
| C | 2.104217  | -0.105056 | 0.624471  |
| H | -0.721414 | -0.076034 | -0.762511 |
| H | -0.856440 | 0.175946  | 1.950307  |
| H | 1.775694  | 0.103163  | 2.746729  |
| C | 3.558391  | -0.062763 | 0.349186  |
| O | 3.979831  | 0.295313  | -0.742465 |
| O | 1.308411  | -0.154038 | -0.456599 |
| N | 4.387475  | -0.424687 | 1.394228  |
| N | 5.894652  | 0.355054  | 0.982556  |
| N | 6.865707  | -0.024343 | 1.386037  |

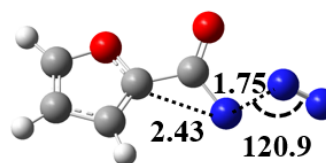

**2-S<sub>0</sub>** -396.6706297 (1.00)

|   |           |           |          |
|---|-----------|-----------|----------|
| C | -2.117557 | -0.283360 | 0.000000 |
| C | -2.030899 | 1.057287  | 0.000000 |
| C | -0.628761 | 1.352572  | 0.000000 |
| C | -0.010140 | 0.159673  | 0.000000 |
| H | -2.945807 | -0.957506 | 0.000000 |
| H | -2.842716 | 1.753478  | 0.000000 |
| H | -0.160550 | 2.314972  | 0.000000 |
| C | 1.389775  | -0.206937 | 0.000000 |
| O | 1.929511  | -1.383489 | 0.000000 |
| N | 2.537142  | 0.351961  | 0.000000 |
| O | -0.904345 | -0.843819 | 0.000000 |

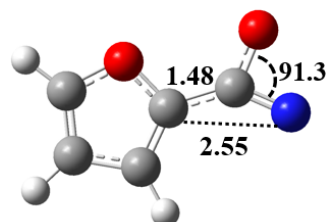

**2-S<sub>0</sub>-TS** -396.6362143 (1.94)

|   |           |           |           |
|---|-----------|-----------|-----------|
| C | -2.139931 | -0.191562 | 0.181984  |
| C | -2.083645 | 1.128572  | -0.102336 |
| C | -0.677921 | 1.453250  | -0.210547 |
| C | -0.039730 | 0.283506  | 0.004813  |
| H | -2.944347 | -0.872216 | 0.349773  |
| H | -2.911774 | 1.795947  | -0.216245 |
| H | -0.227875 | 2.401843  | -0.409398 |
| C | 1.447147  | -0.059986 | 0.044884  |
| O | 1.679117  | -0.943392 | -0.845529 |
| N | 1.975119  | 0.637908  | 0.950664  |
| O | -0.891494 | -0.722873 | 0.250637  |

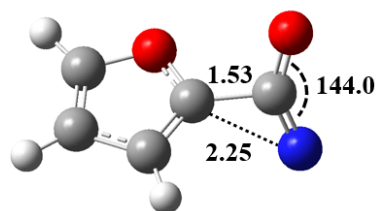

|                        |                            |           |           |
|------------------------|----------------------------|-----------|-----------|
| <b>2-S<sub>1</sub></b> | <b>-396.6315037 (2.06)</b> |           |           |
| C                      | -2.099242                  | -0.285273 | -0.004086 |
| C                      | -2.000973                  | 1.052852  | -0.002896 |
| C                      | -0.594327                  | 1.335549  | 0.004638  |
| C                      | 0.016972                   | 0.139086  | 0.008739  |
| H                      | -2.931523                  | -0.954335 | -0.006746 |
| H                      | -2.806497                  | 1.756590  | -0.003661 |
| H                      | -0.120418                  | 2.295049  | 0.009564  |
| C                      | 1.433607                   | -0.241847 | -0.000786 |
| O                      | 1.784805                   | -1.536501 | 0.010368  |
| N                      | 2.421319                   | 0.608366  | -0.017912 |
| O                      | -0.888073                  | -0.854709 | 0.002776  |

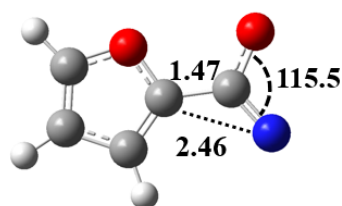

|                           |                            |           |           |
|---------------------------|----------------------------|-----------|-----------|
| <b>2-S<sub>1</sub>-TS</b> | <b>-396.5980592 (2.97)</b> |           |           |
| C                         | -1.927193                  | -0.209426 | -0.002020 |
| C                         | -2.021852                  | 1.159957  | -0.001445 |
| C                         | -0.716897                  | 1.650711  | 0.007179  |
| C                         | 0.259433                   | 0.572325  | 0.011906  |
| H                         | -2.678927                  | -0.973203 | -0.008756 |
| H                         | -2.926225                  | 1.733954  | -0.007020 |
| H                         | -0.403884                  | 2.675298  | 0.009851  |
| C                         | 1.661009                   | -0.159238 | 0.020350  |
| O                         | 2.238118                   | -1.176644 | 0.024146  |
| N                         | 1.644139                   | 1.162761  | 0.020059  |
| O                         | -0.657833                  | -0.624613 | 0.005816  |

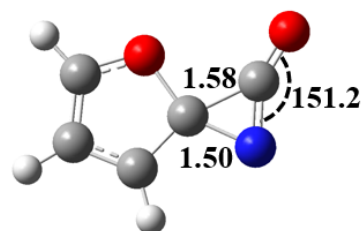

|                        |                            |           |           |
|------------------------|----------------------------|-----------|-----------|
| <b>2-T<sub>1</sub></b> | <b>-396.6744102 (0.90)</b> |           |           |
| C                      | -2.118466                  | -0.287535 | -0.000527 |
| C                      | -1.988235                  | 1.060301  | -0.000581 |
| C                      | -0.570017                  | 1.311218  | 0.000714  |
| C                      | 0.017122                   | 0.084629  | -0.000311 |
| H                      | -2.966532                  | -0.935841 | -0.001207 |

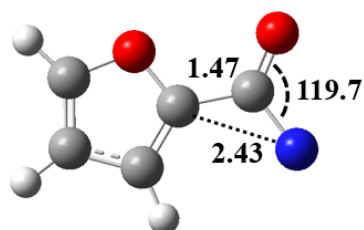

|   |           |           |           |
|---|-----------|-----------|-----------|
| H | -2.777307 | 1.782474  | -0.001543 |
| H | -0.072703 | 2.258616  | 0.000964  |
| C | 1.428794  | -0.320028 | 0.000110  |
| O | 1.809218  | -1.470271 | 0.000144  |
| N | 2.365344  | 0.721717  | 0.001302  |
| O | -0.911568 | -0.890451 | 0.000934  |

**2-(S<sub>0</sub>/S<sub>1</sub>)<sub>x</sub>** -396.6261043 (2.21)

|   |           |           |           |
|---|-----------|-----------|-----------|
| C | -2.104059 | -0.282144 | -0.005115 |
| C | -1.972117 | 1.054725  | -0.003867 |
| C | -0.580095 | 1.292068  | 0.007981  |
| C | 0.019807  | 0.086774  | 0.015745  |
| H | -2.955804 | -0.925737 | -0.011620 |
| H | -2.755032 | 1.782910  | -0.017209 |
| H | -0.068636 | 2.232986  | 0.003842  |
| C | 1.436690  | -0.300914 | -0.011747 |
| O | 1.714666  | -1.497224 | -0.028987 |
| N | 2.392492  | 0.751896  | 0.040882  |
| O | -0.912261 | -0.880515 | 0.010094  |

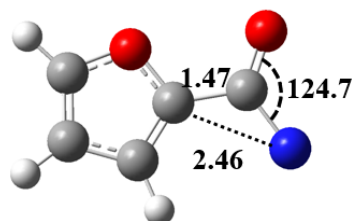

**2-(S<sub>0</sub>/T<sub>1</sub>)<sub>x</sub>** -396.6653040 (1.14)

|   |           |           |           |
|---|-----------|-----------|-----------|
| C | -2.118128 | -0.286355 | -0.004736 |
| C | -2.009802 | 1.065513  | -0.000757 |
| C | -0.599673 | 1.342440  | 0.002451  |
| C | 0.006712  | 0.124787  | 0.000397  |
| H | -2.953059 | -0.951217 | -0.008248 |
| H | -2.812276 | 1.772620  | -0.000335 |
| H | -0.116195 | 2.296948  | 0.005666  |
| C | 1.412613  | -0.252939 | 0.002319  |
| O | 1.856242  | -1.450327 | -0.006224 |
| N | 2.450744  | 0.518527  | 0.013367  |
| O | -0.901529 | -0.865167 | -0.003903 |

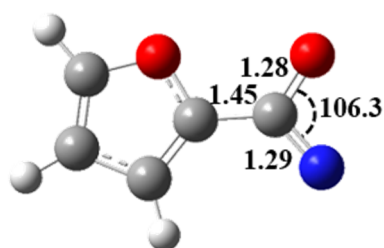

**3-S<sub>0</sub>** -396.7890558 (-2.22)

|   |           |           |           |
|---|-----------|-----------|-----------|
| C | -2.116026 | -0.158672 | -0.003129 |
| C | -2.088053 | 1.177700  | -0.001204 |
| C | -0.695224 | 1.549017  | 0.002077  |
| C | -0.025716 | 0.390747  | 0.001805  |
| H | -2.902771 | -0.879774 | -0.005620 |
| H | -2.933007 | 1.834087  | -0.001884 |
| H | -0.269530 | 2.529595  | 0.004459  |
| C | 1.995432  | -0.880627 | 0.000955  |
| O | 2.779707  | -1.734753 | -0.001248 |
| N | 1.328480  | 0.145093  | 0.004954  |

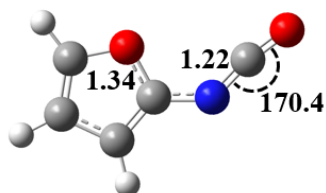

O -0.857638 -0.657583 -0.001168

**3-S<sub>0</sub>-TS** -396.6656085 (1.14)

|   |           |           |           |
|---|-----------|-----------|-----------|
| C | -2.193121 | -0.104803 | -0.272153 |
| C | -2.141878 | 1.208285  | 0.117491  |
| C | -0.779976 | 1.506398  | 0.168620  |
| C | -0.051433 | 0.392278  | -0.235052 |
| H | -3.041021 | -0.746346 | -0.406667 |
| H | -2.975334 | 1.839027  | 0.343456  |
| H | -0.318870 | 2.430965  | 0.448451  |
| C | 2.195989  | -0.886830 | 0.595563  |
| O | 3.183335  | -1.397689 | 0.363811  |
| N | 1.191749  | 0.225278  | -0.499061 |
| O | -1.026019 | -0.614223 | -0.498518 |

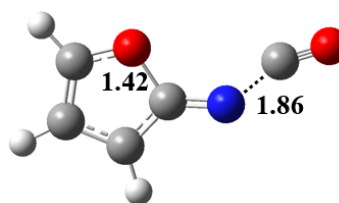

**3-S<sub>1</sub>** -396.6914817 (0.43)

|   |           |           |           |
|---|-----------|-----------|-----------|
| C | 0.126441  | 0.095845  | -0.030954 |
| C | 0.034882  | -0.072197 | 1.295830  |
| C | 1.384177  | -0.026426 | 1.790527  |
| C | 2.156273  | 0.167554  | 0.707093  |
| H | -0.596131 | 0.133724  | -0.817124 |
| H | -0.863059 | -0.214010 | 1.860683  |
| H | 1.725465  | -0.121385 | 2.801035  |
| C | 4.069126  | 0.498229  | -0.631851 |
| O | 5.231924  | 0.624592  | -0.884051 |
| N | 3.559303  | 0.286553  | 0.652417  |
| O | 1.410843  | 0.245473  | -0.405851 |

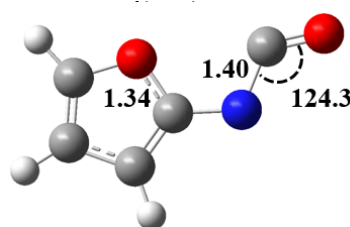

**3-S<sub>1</sub>-TS** -396.6170643 (2.46)

|   |           |           |           |
|---|-----------|-----------|-----------|
| C | -2.086014 | -0.141499 | 0.013323  |
| C | -2.139750 | 1.195903  | -0.013024 |
| C | -0.779326 | 1.644526  | -0.014672 |
| C | -0.027535 | 0.523344  | 0.012328  |
| H | -2.832791 | -0.901673 | 0.022030  |
| H | -3.020789 | 1.801305  | -0.031888 |
| H | -0.416602 | 2.647032  | -0.031662 |
| C | 1.948343  | -1.466304 | 0.007393  |
| O | 3.005971  | -1.871289 | -0.020925 |
| N | 1.370106  | 0.451941  | 0.027035  |
| O | -0.805968 | -0.568455 | 0.030056  |

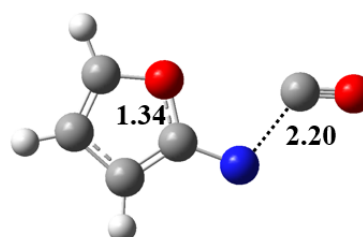

**3-S<sub>2</sub>** -396.6177663 (2.44)

|   |           |           |           |
|---|-----------|-----------|-----------|
| C | -2.289742 | -0.082737 | 0.035749  |
| C | -2.056544 | 1.233960  | -0.034664 |
| C | -0.626898 | 1.383841  | -0.013247 |
| C | -0.139585 | 0.131714  | 0.060780  |
| H | -3.181279 | -0.669794 | 0.051862  |
| H | -2.789198 | 2.011735  | -0.090499 |
| H | -0.053534 | 2.286198  | -0.040586 |
| C | 2.157299  | -0.752492 | -0.449557 |
| O | 3.205201  | -1.120000 | 0.193445  |
| N | 1.121733  | -0.338027 | 0.188856  |
| O | -1.131799 | -0.769569 | 0.097859  |

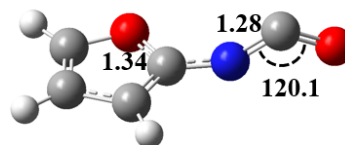

**3-S<sub>2</sub>-TS** -396.5809899 (3.44)

|   |           |           |           |
|---|-----------|-----------|-----------|
| C | -2.164783 | -0.066914 | 0.032121  |
| C | -2.153378 | 1.269737  | -0.014732 |
| C | -0.773965 | 1.654028  | -0.047898 |
| C | -0.080226 | 0.496771  | -0.017189 |
| H | -2.948037 | -0.785905 | 0.068090  |
| H | -3.001947 | 1.918885  | -0.025291 |
| H | -0.367915 | 2.636001  | -0.087909 |
| C | 2.085092  | -1.773469 | 0.045580  |
| O | 3.216055  | -1.814127 | 0.046552  |
| N | 1.311022  | 0.337034  | -0.030827 |
| O | -0.906273 | -0.557211 | 0.031496  |

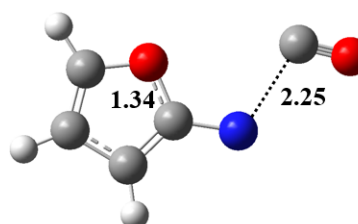

**3-(S<sub>0</sub>/S<sub>1</sub>)<sub>x</sub>** -396.6603287 (1.26)

|   |           |           |           |
|---|-----------|-----------|-----------|
| C | -1.948410 | -0.148666 | -0.037754 |
| C | -2.205880 | 1.212893  | 0.097245  |
| C | -0.968249 | 1.782533  | -0.026350 |
| C | -0.020966 | 0.812142  | -0.217840 |
| H | -2.631556 | -0.997690 | -0.003296 |
| H | -3.167656 | 1.664763  | 0.265271  |
| H | -0.603909 | 2.817475  | 0.009553  |
| C | 2.037162  | -2.096205 | 0.262076  |
| O | 3.151438  | -2.287425 | 0.210347  |
| N | 1.225033  | 0.959565  | -0.342414 |
| O | -0.715541 | -0.423896 | -0.221584 |

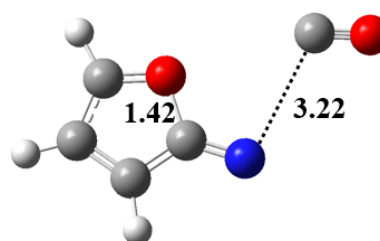

**4-S<sub>0</sub>** -283.5347533 (0.93)

|   |           |           |           |
|---|-----------|-----------|-----------|
| C | -2.109388 | -0.177765 | -0.003512 |
| C | -2.064507 | 1.208593  | -0.001413 |
| C | -0.730706 | 1.583298  | 0.002373  |
| C | 0.049129  | 0.340011  | 0.002825  |
| H | -2.920048 | -0.870910 | -0.005035 |

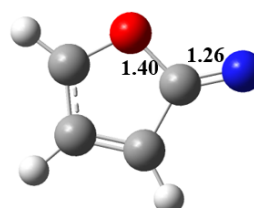

|   |           |           |           |
|---|-----------|-----------|-----------|
| H | -2.919114 | 1.853269  | -0.002452 |
| H | -0.303083 | 2.562428  | 0.004579  |
| N | 1.294815  | 0.149020  | 0.004687  |
| O | -0.862219 | -0.726656 | -0.001367 |

4-T<sub>1</sub> -283.555481 (0.37)

|   |           |           |           |
|---|-----------|-----------|-----------|
| C | -2.108988 | -0.170654 | -0.002997 |
| C | -2.075321 | 1.196481  | -0.000886 |
| C | -0.713051 | 1.568618  | 0.002202  |
| C | 0.025523  | 0.363310  | 0.002637  |
| H | -2.913362 | -0.872174 | -0.006158 |
| H | -2.926097 | 1.845428  | -0.002102 |
| H | -0.290329 | 2.550501  | 0.003989  |
| N | 1.305602  | 0.144573  | 0.004822  |
| O | -0.869099 | -0.704795 | -0.000821 |

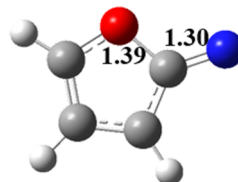

4-(S<sub>0</sub>/T<sub>1</sub>)<sub>x</sub> -283.5347533 (0.95)

|   |           |           |           |
|---|-----------|-----------|-----------|
| C | -2.101028 | -0.199419 | 0.060252  |
| C | -2.050547 | 1.204081  | 0.069177  |
| C | -0.729442 | 1.571391  | -0.025665 |
| C | 0.097442  | 0.394653  | -0.006287 |
| H | -2.932999 | -0.841996 | -0.159305 |
| H | -2.906162 | 1.848100  | 0.056011  |
| H | -0.316964 | 2.555291  | -0.131802 |
| N | 1.304359  | 0.149086  | -0.006022 |
| O | -0.929781 | -0.759899 | 0.144326  |

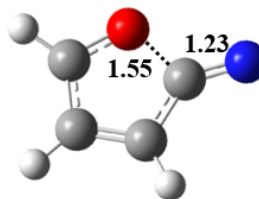

*syn-9*-S<sub>0</sub> -283.6070294 (-1.03)

|   |           |           |           |
|---|-----------|-----------|-----------|
| C | -2.424125 | -0.242432 | -0.295305 |
| C | -2.072225 | 1.123412  | 0.172388  |
| C | -0.845176 | 1.677545  | 0.144562  |
| C | 0.356730  | 1.051786  | -0.346676 |
| H | -3.479207 | -0.502940 | -0.237298 |
| H | -2.882353 | 1.712387  | 0.563889  |
| H | -0.709494 | 2.677976  | 0.511196  |
| N | 1.380768  | 0.655295  | -0.719150 |
| O | -1.621623 | -1.037287 | -0.716513 |

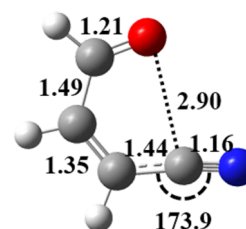

The following energies in parentheses are relative to **5-S<sub>0</sub>**.

**5-S<sub>0</sub>** -506.0566588 (0.00)

|   |           |           |           |
|---|-----------|-----------|-----------|
| C | -2.691790 | -0.958463 | 0.000808  |
| C | -1.381472 | -1.202676 | -0.000541 |
| C | -0.749385 | 0.104016  | -0.000663 |
| C | -1.765270 | 1.000955  | -0.000060 |
| H | -3.546567 | -1.598969 | 0.001302  |
| H | -0.898246 | -2.156075 | -0.001314 |
| H | -1.784078 | 2.067861  | -0.000113 |
| O | -2.948704 | 0.366127  | 0.000027  |
| C | 0.677818  | 0.453651  | 0.000225  |
| O | 1.093175  | 1.581632  | -0.000530 |
| N | 1.514751  | -0.678882 | 0.000302  |
| N | 2.728281  | -0.419862 | 0.000447  |
| N | 3.849241  | -0.361586 | 0.000401  |

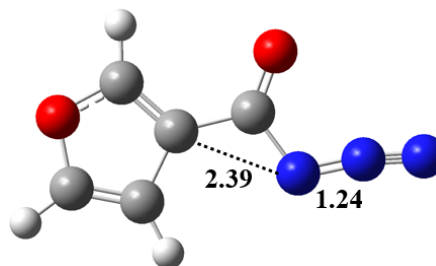

**5-S<sub>1</sub>** -505.9416567 (3.13)

|   |           |           |           |
|---|-----------|-----------|-----------|
| C | -2.698315 | -0.976684 | -0.002808 |
| C | -1.386715 | -1.217690 | 0.000732  |
| C | -0.759548 | 0.092131  | 0.003412  |
| C | -1.780518 | 0.984958  | 0.001207  |
| H | -3.552324 | -1.618131 | -0.005741 |
| H | -0.905388 | -2.172465 | 0.001754  |
| H | -1.802583 | 2.052405  | -0.000296 |
| O | -2.959969 | 0.346347  | -0.002707 |
| C | 0.654771  | 0.483863  | 0.006558  |
| O | 1.004191  | 1.647050  | 0.007590  |
| N | 1.586383  | -0.581992 | 0.002818  |
| N | 2.889991  | -0.054344 | -0.002329 |
| N | 3.807781  | -0.787714 | -0.009900 |

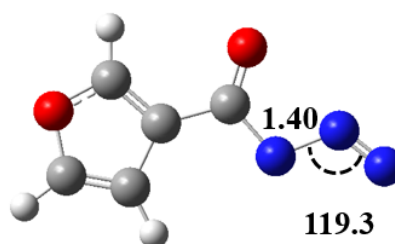

**5-S<sub>1</sub>-TS** -505.9400714 (3.17)

|   |           |           |           |
|---|-----------|-----------|-----------|
| C | 0.023030  | 0.064064  | 0.015720  |
| C | -0.006923 | 0.017992  | 1.348190  |
| C | 1.382425  | -0.084714 | 1.757845  |
| C | 2.100748  | -0.093774 | 0.608287  |
| H | -0.743547 | 0.155234  | -0.722534 |
| H | -0.871526 | 0.065041  | 1.975913  |
| H | 3.148590  | -0.150531 | 0.413773  |
| O | 1.283960  | -0.010000 | -0.454377 |
| C | 1.989377  | -0.061338 | 3.102047  |
| O | 3.173375  | 0.243675  | 3.248010  |
| N | 1.180734  | -0.391661 | 4.167378  |

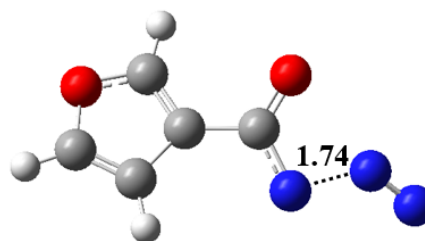

|   |          |           |          |
|---|----------|-----------|----------|
| N | 2.015854 | 0.291715  | 5.539286 |
| N | 1.848387 | -0.105452 | 6.570843 |

**6-S<sub>0</sub>** -396.6737993 (0.93)

|   |           |           |           |
|---|-----------|-----------|-----------|
| C | -2.751613 | -0.962297 | 0.000756  |
| C | -1.427534 | -1.233674 | -0.000103 |
| C | -0.777885 | 0.057349  | -0.000933 |
| C | -1.777111 | 0.977709  | -0.000494 |
| H | -3.621862 | -1.579493 | 0.001667  |
| H | -0.963322 | -2.197015 | -0.000115 |
| H | -1.775644 | 2.045229  | -0.000721 |
| O | -2.968019 | 0.372031  | 0.000418  |
| C | 0.640923  | 0.340383  | -0.001247 |
| O | 1.242894  | 1.487631  | 0.000187  |
| N | 1.717181  | -0.311236 | 0.000116  |

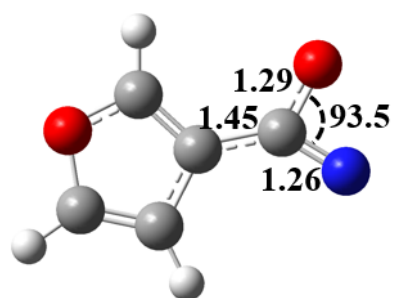

**6-S<sub>0</sub>-TS** -396.6390867 (1.87)

|   |           |           |           |
|---|-----------|-----------|-----------|
| C | -2.774778 | -0.934402 | -0.015302 |
| C | -1.440824 | -1.138716 | 0.013259  |
| C | -0.868488 | 0.187922  | 0.025379  |
| C | -1.901649 | 1.060823  | 0.002857  |
| H | -3.609190 | -1.599471 | -0.033480 |
| H | -0.916898 | -2.069024 | 0.024999  |
| H | -1.948176 | 2.125920  | 0.002133  |
| O | -3.064508 | 0.389411  | -0.021728 |
| C | 0.630260  | 0.586317  | 0.057155  |
| O | 0.683108  | 1.849545  | 0.055763  |
| N | 1.306106  | -0.473714 | 0.074616  |

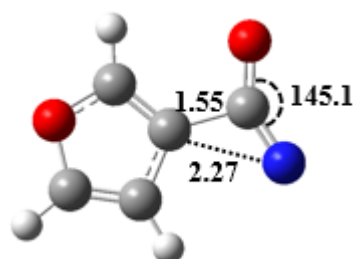

**6-S<sub>1</sub>** -396.6364104 (1.95)

|   |           |           |           |
|---|-----------|-----------|-----------|
| C | -2.727671 | -0.952333 | -0.001963 |
| C | -1.405943 | -1.238404 | 0.005928  |
| C | -0.739559 | 0.044846  | 0.006188  |
| C | -1.731537 | 0.974633  | 0.001765  |
| H | -3.604531 | -1.560739 | -0.005752 |
| H | -0.956578 | -2.208738 | 0.010345  |
| H | -1.713513 | 2.041822  | -0.002680 |
| O | -2.932617 | 0.383201  | -0.002599 |
| C | 0.688749  | 0.352164  | -0.002750 |
| O | 1.023738  | 1.659922  | 0.009113  |
| N | 1.637468  | -0.499760 | -0.018066 |

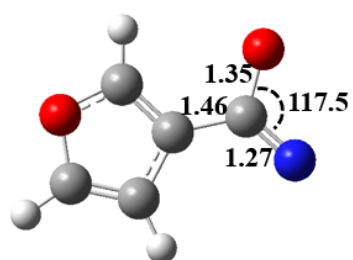

**6-S<sub>1</sub>-TS** -396.5956134 (3.06)



|   |           |           |           |
|---|-----------|-----------|-----------|
| C | -2.572739 | -0.995996 | 0.099883  |
| C | -1.235984 | -0.951967 | -0.014339 |
| C | -0.882900 | 0.473203  | -0.104641 |
| C | -2.136937 | 1.129663  | -0.151172 |
| H | -3.253692 | -1.811381 | 0.211932  |
| H | -0.555792 | -1.776834 | 0.000785  |
| H | -2.398233 | 2.160111  | -0.196849 |
| O | -3.138122 | 0.240772  | 0.053219  |
| C | 0.552995  | 1.144358  | 0.549565  |
| O | 1.462192  | 1.618382  | 1.194544  |
| N | 0.336565  | 0.970898  | -0.768641 |

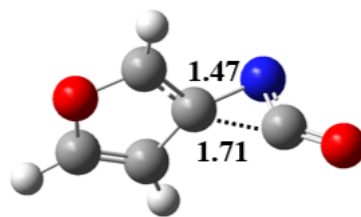

**6-T<sub>1</sub>** -396.6756552 (0.88)

|   |           |           |           |
|---|-----------|-----------|-----------|
| C | -2.711890 | -0.960281 | 0.000778  |
| C | -1.381873 | -1.203987 | 0.000039  |
| C | -0.754374 | 0.099085  | -0.000021 |
| C | -1.774814 | 0.997432  | -0.000355 |
| H | -3.569552 | -1.595431 | 0.001292  |
| H | -0.903174 | -2.160542 | -0.000035 |
| H | -1.791776 | 2.064593  | -0.000778 |
| O | -2.955067 | 0.369125  | 0.000311  |
| C | 0.677043  | 0.432044  | -0.000342 |
| O | 1.109741  | 1.570215  | 0.000665  |
| N | 1.593744  | -0.615636 | -0.002022 |

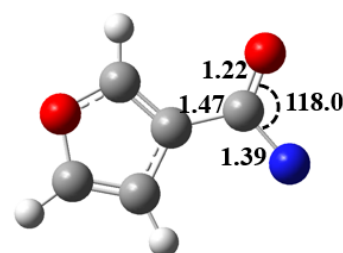

**6-(S<sub>0</sub>/S<sub>1</sub>)<sub>x</sub>** -396.6216974 (2.35)

|   |           |           |           |
|---|-----------|-----------|-----------|
| C | -2.704548 | -0.959216 | 0.008916  |
| C | -1.375157 | -1.232024 | 0.029364  |
| C | -0.720681 | 0.051890  | -0.017224 |
| C | -1.732101 | 0.977520  | -0.056394 |
| H | -3.575113 | -1.578747 | 0.038150  |
| H | -0.927319 | -2.202279 | 0.102824  |
| H | -1.705655 | 2.044613  | -0.103301 |
| O | -2.921363 | 0.377491  | -0.050697 |
| C | 0.706081  | 0.492904  | 0.051726  |
| O | 1.037583  | 1.619859  | 0.276933  |
| N | 1.456278  | -0.595399 | -0.280767 |

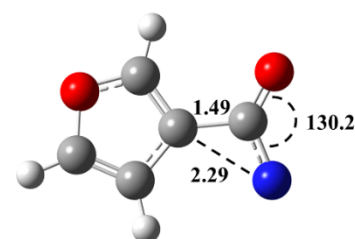

**6-(S<sub>0</sub>/T<sub>1</sub>)<sub>x</sub>** -396.667051 (1.11)

|   |           |           |           |
|---|-----------|-----------|-----------|
| C | -2.731311 | -0.962330 | 0.000465  |
| C | -1.406210 | -1.218922 | 0.000193  |
| C | -0.766796 | 0.082803  | -0.000538 |
| C | -1.774228 | 0.990381  | -0.000184 |
| H | -3.593087 | -1.591921 | 0.000957  |

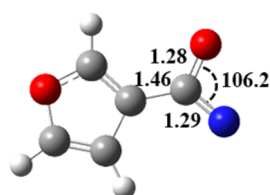

|   |           |           |           |
|---|-----------|-----------|-----------|
| H | -0.931680 | -2.177571 | 0.000619  |
| H | -1.783835 | 2.057789  | -0.000202 |
| O | -2.966089 | 0.371996  | 0.000236  |
| C | 0.661270  | 0.368198  | -0.000608 |
| O | 1.177552  | 1.539098  | 0.001211  |
| N | 1.652423  | -0.462904 | -0.002616 |

7-S<sub>0</sub> -396.7845272 (-2.08)

|   |           |           |           |
|---|-----------|-----------|-----------|
| C | -2.838330 | -1.083074 | 0.000459  |
| C | -1.521498 | -1.383774 | 0.000355  |
| C | -0.844440 | -0.109177 | -0.001333 |
| C | -1.812238 | 0.838820  | -0.002419 |
| H | -3.719220 | -1.685873 | 0.001569  |
| H | -1.068494 | -2.352448 | 0.001313  |
| H | -1.784044 | 1.906042  | -0.004505 |
| O | -3.029770 | 0.254905  | -0.001250 |
| C | 1.355119  | 0.922123  | 0.002230  |
| O | 2.265794  | 1.644902  | 0.006091  |
| N | 0.535127  | 0.044168  | -0.002979 |

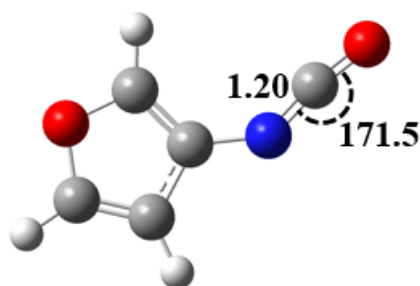

7-S<sub>0</sub>-TS -396.6350867 (1.98)

|   |           |           |           |
|---|-----------|-----------|-----------|
| C | 0.019577  | -0.240034 | 0.155530  |
| C | 0.264815  | -0.167034 | 1.473561  |
| C | 1.643612  | 0.329871  | 1.600739  |
| C | 2.060016  | 0.485236  | 0.307151  |
| H | -0.819015 | -0.527093 | -0.437968 |
| H | -0.404154 | -0.418096 | 2.269805  |
| H | 2.992189  | 0.842432  | -0.077961 |
| O | 1.124171  | 0.184741  | -0.559436 |
| C | 2.344541  | 0.752547  | 2.659267  |
| O | 3.048603  | -0.637527 | 3.822471  |
| N | 3.423210  | -0.599546 | 4.889891  |

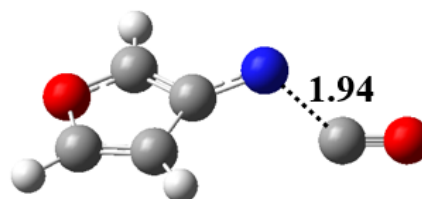

7-S<sub>1</sub> -396.6831102 (0.68)

|   |           |           |           |
|---|-----------|-----------|-----------|
| C | -2.811634 | -1.068432 | -0.001709 |
| C | -1.512986 | -1.419953 | 0.001448  |
| C | -0.760154 | -0.166137 | 0.002506  |
| C | -1.746968 | 0.835987  | 0.003168  |
| H | -3.714284 | -1.640844 | -0.006198 |
| H | -1.099279 | -2.406689 | 0.000116  |
| H | -1.682930 | 1.904344  | 0.002262  |
| O | -2.972547 | 0.283157  | 0.000323  |
| C | 1.064632  | 1.229039  | -0.003691 |
| O | 2.216032  | 1.513888  | -0.005211 |

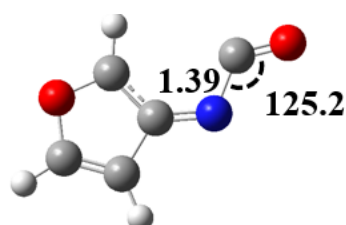

N 0.558126 -0.067747 0.006516

7-S<sub>1</sub>-TS -396.6087942 (2.70)

|   |           |           |           |
|---|-----------|-----------|-----------|
| C | -0.007783 | 0.002063  | -0.015260 |
| C | 0.014989  | -0.001835 | 1.333878  |
| C | 1.429793  | -0.003673 | 1.693903  |
| C | 2.103599  | -0.000540 | 0.519491  |
| H | -0.810941 | 0.004947  | -0.718032 |
| H | -0.817498 | -0.002807 | 2.004472  |
| H | 3.142242  | -0.000290 | 0.290774  |
| O | 1.239587  | 0.002687  | -0.526109 |
| N | 1.797971  | -0.006686 | 3.015740  |
| C | 3.825593  | -0.008261 | 3.278796  |
| O | 4.376756  | -0.012262 | 4.256858  |

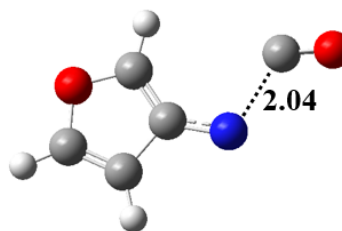

7-S<sub>2</sub> -396.6079240 (2.72)

|   |           |           |           |
|---|-----------|-----------|-----------|
| C | -2.754446 | -1.109290 | 0.114583  |
| C | -1.435410 | -1.294063 | -0.106790 |
| C | -0.861116 | 0.039231  | -0.214047 |
| C | -1.954514 | 0.908221  | -0.067710 |
| H | -3.558613 | -1.794632 | 0.279567  |
| H | -0.905637 | -2.221675 | -0.169403 |
| H | -2.024661 | 1.974641  | -0.097930 |
| O | -3.082776 | 0.206366  | 0.142826  |
| C | 1.289653  | 0.756497  | 0.378210  |
| O | 2.433965  | 1.154743  | 0.223122  |
| N | 0.391562  | 0.376582  | -0.482900 |

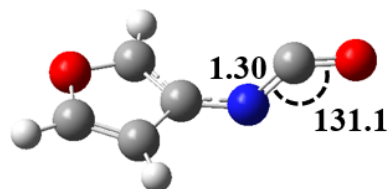

7-S<sub>2</sub>-TS -396.5914412 (2.70)

|   |           |           |           |
|---|-----------|-----------|-----------|
| C | 0.080441  | 0.020371  | -0.017368 |
| C | -0.137614 | -0.066832 | 1.320261  |
| C | 1.158668  | -0.018701 | 1.944537  |
| C | 2.088887  | 0.170528  | 0.835339  |
| H | -0.584443 | 0.027373  | -0.854344 |
| H | -1.082402 | -0.167989 | 1.813447  |
| H | 3.155218  | 0.084040  | 0.787679  |
| O | 1.409143  | 0.112153  | -0.319683 |
| N | 1.501459  | 0.031212  | 3.217917  |
| C | 2.814058  | 1.135861  | 3.398990  |
| O | 3.401692  | 1.100159  | 4.393537  |

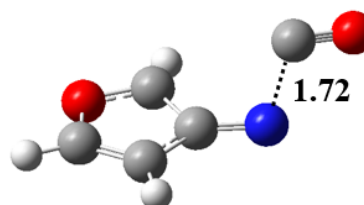

7-(S<sub>0</sub>/S<sub>1</sub>)<sub>x</sub> -396.6091355 (2.52)

|   |           |           |           |
|---|-----------|-----------|-----------|
| C | -0.048492 | -0.029780 | -0.240673 |
| C | -0.381280 | -0.004828 | 1.044931  |
| C | 0.904536  | 0.035106  | 1.762289  |
| C | 1.839388  | 0.031274  | 0.803422  |
| H | -0.578246 | -0.060328 | -1.159183 |
| H | -1.349925 | -0.010149 | 1.513263  |
| H | 2.903909  | 0.061074  | 1.206780  |
| O | 1.419094  | -0.004281 | -0.364234 |
| N | 1.354377  | 0.072177  | 2.986395  |
| C | 4.802922  | -0.017092 | 3.177272  |
| O | 5.254990  | -0.100245 | 4.200495  |

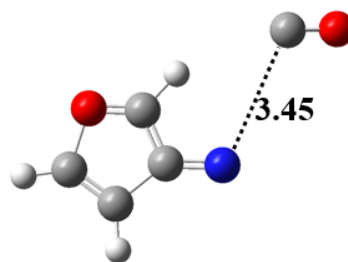

|                  |                     |           |           |
|------------------|---------------------|-----------|-----------|
| 7-T <sub>1</sub> | -396.6860605 (0.60) |           |           |
| C                | -2.810427           | -1.070536 | 0.000124  |
| C                | -1.513233           | -1.416814 | -0.000078 |
| C                | -0.761372           | -0.163434 | -0.000314 |
| C                | -1.750763           | 0.837790  | -0.000095 |
| H                | -3.712442           | -1.641585 | -0.000024 |
| H                | -1.095258           | -2.400658 | -0.000775 |
| H                | -1.691145           | 1.902354  | 0.000349  |
| O                | -2.973225           | 0.285159  | 0.000220  |
| C                | 1.073604            | 1.226205  | -0.000638 |
| O                | 2.218985            | 1.514738  | 0.001046  |
| N                | 0.553284            | -0.076605 | -0.000286 |

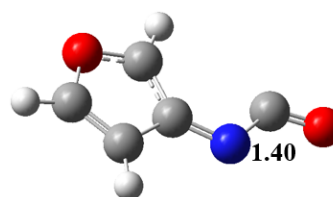

|                      |                     |           |           |
|----------------------|---------------------|-----------|-----------|
| 7-T <sub>1</sub> -TS | -396.6424244 (1.78) |           |           |
| C                    | 0.160798            | -0.262620 | 0.127599  |
| C                    | 0.425085            | -0.168823 | 1.445356  |
| C                    | 1.780141            | 0.369588  | 1.540540  |
| C                    | 2.179810            | 0.528227  | 0.236549  |
| H                    | -0.684883           | -0.592702 | -0.433981 |
| H                    | -0.220809           | -0.434684 | 2.255870  |
| H                    | 3.080613            | 0.925649  | -0.178840 |
| O                    | 1.217505            | 0.182333  | -0.611500 |
| N                    | 2.477729            | 0.825761  | 2.609782  |
| C                    | 3.208436            | -0.601735 | 3.661201  |
| O                    | 3.712382            | -0.768910 | 4.657127  |

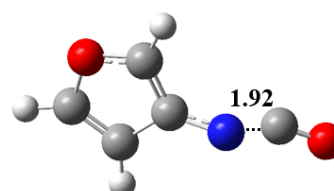

8-S<sub>0</sub> -283.5181120 (1.53)

|   |           |           |           |
|---|-----------|-----------|-----------|
| C | 1.330534  | 0.554152  | 0.009703  |
| C | 0.147179  | 1.177190  | -0.075008 |
| C | -0.887101 | 0.127161  | -0.055950 |
| C | -0.058076 | -1.143316 | -0.149226 |
| H | 2.328009  | 0.935887  | 0.042869  |
| H | -0.024769 | 2.230902  | -0.128206 |
| H | -0.358044 | -2.106966 | 0.214690  |
| O | 1.224762  | -0.806200 | 0.110527  |
| N | -2.126193 | 0.179687  | 0.154602  |

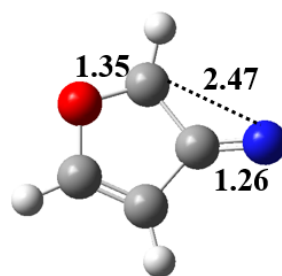

**8-S<sub>1</sub>** -283.4968104 (2.11)

|   |           |           |           |
|---|-----------|-----------|-----------|
| C | 1.352160  | 0.567207  | -0.014095 |
| C | 0.152469  | 1.169884  | -0.025843 |
| C | -0.861969 | 0.107944  | -0.005171 |
| C | -0.067922 | -1.081810 | 0.012648  |
| H | 2.358765  | 0.917650  | -0.017630 |
| H | -0.042428 | 2.221770  | -0.040951 |
| H | -0.359699 | -2.114379 | 0.033316  |
| O | 1.210917  | -0.803099 | 0.006674  |
| N | -2.165992 | 0.163331  | -0.011949 |

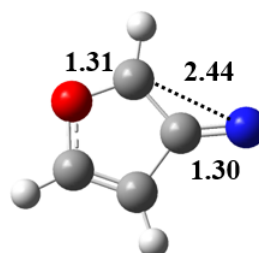

**8-T<sub>1</sub>** -283.5464855 (0.76)

|   |           |           |           |
|---|-----------|-----------|-----------|
| C | 0.672143  | -1.287324 | 0.000172  |
| C | 1.164289  | -0.033482 | -0.000569 |
| C | 0.004680  | 0.851465  | -0.000278 |
| C | -1.103010 | -0.021793 | -0.000392 |
| H | 1.143514  | -2.245421 | 0.000835  |
| H | 2.192353  | 0.260365  | -0.000594 |
| H | -2.155960 | 0.149958  | -0.000207 |
| O | -0.682345 | -1.297683 | -0.000073 |
| N | -0.016804 | 2.183087  | 0.001106  |

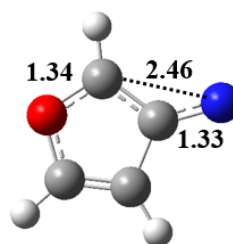

**8-T<sub>1</sub>-TS** -283.4249124 (4.07)

|   |           |           |           |
|---|-----------|-----------|-----------|
| C | 0.656106  | -1.287833 | -0.008487 |
| C | 1.012272  | 0.005635  | -0.018267 |
| C | -0.086239 | 0.956978  | 0.015218  |
| C | -1.433528 | 0.549510  | 0.176237  |
| H | 1.343928  | -2.114152 | -0.018575 |
| H | 2.037358  | 0.315750  | -0.036924 |
| H | -2.345904 | 1.001065  | -0.157824 |
| O | -0.616214 | -1.698076 | 0.023573  |
| N | -0.209249 | 2.219859  | 0.024036  |

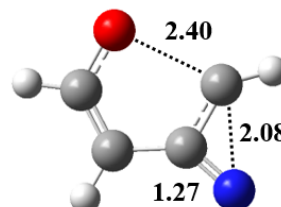

**8-(S<sub>0</sub>/S<sub>1</sub>)<sub>x</sub>** -283.4269377 (4.01)

|   |            |            |            |
|---|------------|------------|------------|
| C | 0.0000000  | 0.0000000  | 0.0000000  |
| C | 0.0000000  | 0.0000000  | 1.3785019  |
| C | 1.3506868  | 0.0000000  | 1.8566353  |
| C | 2.3857500  | 0.0011477  | 0.9480884  |
| H | -0.8394076 | -0.0000811 | -0.6693808 |
| H | -0.8717871 | -0.0001863 | 1.9997956  |
| O | 1.2026913  | 0.0002389  | -0.5547916 |
| N | 2.0104145  | 0.0000098  | 3.0195217  |
| H | 3.4568360  | 0.0016879  | 0.9882861  |

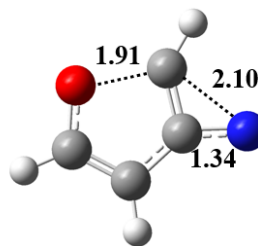

**8-(S<sub>0</sub>/T<sub>1</sub>)<sub>x</sub>** -283.5107680 (1.73)

|   |           |           |           |
|---|-----------|-----------|-----------|
| C | 0.006773  | 0.004398  | 0.003578  |
| C | -0.000767 | -0.013081 | 1.344962  |
| C | 1.423108  | -0.011374 | 1.759032  |
| C | 2.142563  | -0.269481 | 0.444365  |
| H | -0.795959 | 0.072709  | -0.698969 |
| H | -0.849007 | 0.041544  | 1.995145  |
| H | 3.192460  | -0.128693 | 0.236718  |
| O | 1.280675  | 0.051661  | -0.541120 |
| N | 2.044998  | 0.634752  | 2.617360  |

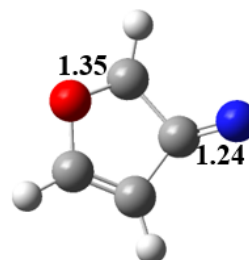

**10-S<sub>0</sub>** -283.4843219 (2.45)

|   |           |           |           |
|---|-----------|-----------|-----------|
| C | -1.529270 | -0.217352 | 0.007665  |
| C | -0.505570 | -1.299411 | -0.013397 |
| C | 0.818208  | -1.110694 | -0.015429 |
| C | 1.657058  | 0.097843  | 0.001179  |
| H | -2.562895 | -0.568770 | 0.000516  |
| H | -0.877686 | -2.309509 | -0.029138 |
| H | 1.107508  | 1.026628  | 0.023784  |
| O | -1.287150 | 0.947176  | 0.030383  |
| N | 2.939770  | 0.178513  | -0.008709 |

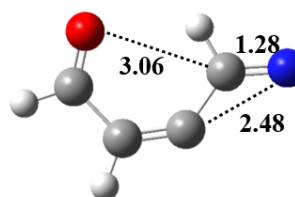

**10-S<sub>0</sub>-TS** -283.4824179 (2.50)

|   |           |           |           |
|---|-----------|-----------|-----------|
| C | -1.509976 | -0.186269 | -0.000229 |
| C | -0.380954 | -1.158125 | -0.000490 |
| C | 0.904647  | -0.783395 | -0.000383 |
| C | 1.772912  | 0.325214  | 0.001016  |
| H | -2.516939 | -0.598490 | 0.001211  |
| H | -0.610023 | -2.207973 | -0.000729 |
| H | 0.633759  | 0.665997  | -0.000370 |
| O | -1.321295 | 0.989670  | -0.001251 |
| N | 2.717618  | 1.078739  | 0.000927  |

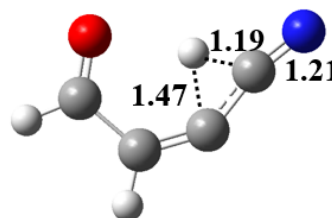

**11-T<sub>1</sub>** -283.4437189 (3.55)

|   |           |           |           |
|---|-----------|-----------|-----------|
| C | 0.743393  | -1.399010 | -0.030385 |
| C | 0.941052  | -0.072979 | -0.028384 |
| C | -0.142791 | 0.882925  | 0.050554  |
| C | -1.492736 | 1.172566  | 0.189899  |
| H | 1.543608  | -2.115127 | -0.089074 |
| H | 1.943098  | 0.304623  | -0.091625 |
| H | -2.319637 | 1.113763  | -0.493029 |
| O | -0.446996 | -2.002569 | 0.031065  |
| N | -0.303994 | 2.148723  | 0.044364  |

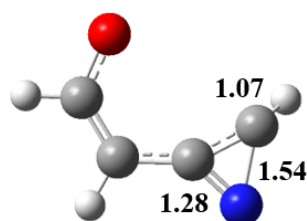

**11-T<sub>1</sub>-TS** -283.4016698 (4.70)

|   |           |           |           |
|---|-----------|-----------|-----------|
| C | -1.549481 | -0.302020 | -0.021973 |
| C | -0.438893 | -1.095209 | -0.006003 |
| C | 0.920645  | -0.727231 | 0.086508  |
| C | 1.825889  | 0.311799  | -0.063191 |
| H | -2.552958 | -0.681053 | -0.059704 |
| H | -0.613933 | -2.154121 | -0.044946 |
| H | 0.799584  | 0.731382  | 0.304194  |
| O | -1.504978 | 1.037585  | 0.006422  |
| N | 2.803874  | 1.004237  | -0.201606 |

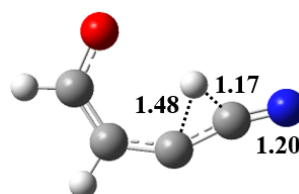

*anti-9*-S<sub>0</sub> -283.6106201 (-0.99)

|   |           |           |           |
|---|-----------|-----------|-----------|
| C | 1.890415  | 0.431308  | 0.000180  |
| C | 0.422176  | 0.685349  | 0.000111  |
| C | -0.449418 | -0.339067 | -0.000236 |
| C | -1.876865 | -0.143353 | 0.000012  |
| H | 2.522489  | 1.321020  | -0.000716 |
| H | 0.086011  | 1.706460  | 0.000292  |
| H | -0.094803 | -1.352333 | -0.000484 |
| O | 2.368143  | -0.656734 | 0.000711  |
| N | -3.041452 | 0.004932  | 0.000155  |

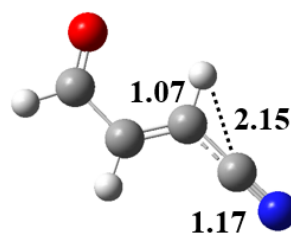

*anti-9*-T<sub>1</sub> -283.522256 (1.42)

|   |           |           |           |
|---|-----------|-----------|-----------|
| C | 1.823483  | 0.518307  | -0.000307 |
| C | 0.456830  | 0.678052  | 0.001155  |
| C | -0.463713 | -0.375963 | 0.001202  |
| C | -1.870644 | -0.142355 | -0.000111 |
| H | 2.525054  | 1.330189  | -0.002077 |
| H | 0.093049  | 1.688361  | 0.001527  |
| H | -0.141943 | -1.399261 | -0.000052 |
| O | 2.423791  | -0.679359 | 0.000235  |
| N | -3.019212 | 0.039611  | -0.001547 |

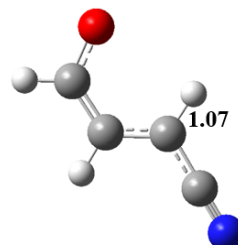

Supplement: d0cp05539e1.pdf [file d0cp05539e1.pdf]
